# Supplementary material for: Riboswitch and small RNAs modulate btuB translation initiation in Escherichia coli and trigger distinct mRNA regulatory mechanisms
Source: PubMed Central journal article supplement (PMC11162775; doi:10.1093/nar/gkae347), 2024-05-14
Supplement: gkae347_supplemental_file.pdf [file gkae347_supplemental_file.pdf]

# **Riboswitch and small RNAs modulate *btuB* translation initiation in *Escherichia coli* and trigger distinct mRNA regulatory mechanisms**

Laurène Bastet<sup>1#¶</sup>, Alexey P. Korepanov<sup>2#&</sup>, Jonathan Jagodnik<sup>2</sup>, Jonathan P. Grondin<sup>1</sup>, Anne-Marie Lamontagne<sup>1</sup>, Maude Guillier<sup>2\*</sup> and Daniel A. Lafontaine<sup>1\*</sup>

<sup>1</sup>Department of Biology, Faculty of Science, Université de Sherbrooke, Sherbrooke, Quebec, Canada, J1K 2R1.

<sup>2</sup>Expression Génétique Microbienne, UMR8261 CNRS, Université Paris Cité, Institut de Biologie Physico-Chimique, 75005 Paris, France.

#These authors contributed equally.

¶Present address: Venvirotech Biotechnology SL, 08130 Santa Perpètua de Modoga, Barcelona, Spain.

&Present address: Institute of Protein Research RAS, 142290 Pushchino, Moscow Region, Russia

\*Corresponding authors. E-mail: maude.guillier@ibpc.fr and daniel.lafontaine@usherbrooke.ca

Keywords: Small RNA, riboswitch, OmrA, AdoCbl, Hfq

## Supplementary Information

### Strains and plasmids constructions

Strains and plasmids constructed and used in this study are listed in the Supplementary Table S1. Corresponding DNA oligonucleotides (oligos) are summarized in the Supplementary Table S2.

Genetic manipulations for the construction of new gene knockouts and reporter fusions were carried out using a recombineering approach that employs phage  $\lambda$  Red recombination functions as described in detail in (1). Simple allelic exchange was performed using the generalized P1 transduction as described in (2). Strains were cultivated in liquid LB, LB agar plates, BYE (LB without salt) agar plates supplemented with 6% (w/v) sucrose (BS plates) or liquid and solid minimal medium A. Acid LB (pH 4.7) was made by addition of HCl. When needed, media were supplemented with an appropriate antibiotic. Unless otherwise stated, kanamycin (Kan) at 50  $\mu\text{g}/\text{mL}$ , chloramphenicol (Cam) at 20  $\mu\text{g}/\text{mL}$ , ampicillin (Amp) at 150  $\mu\text{g}/\text{mL}$  or tetracycline (Tet) at 10  $\mu\text{g}/\text{mL}$  were utilized for plasmid maintenance. For selection of strains carrying a single copy of a drug resistance marker the concentrations were twice as low. During the P1 transduction, selectable plates also contained 5 mM sodium citrate.

#### *Designing an E. coli strain for construction of chromosomal mScarlet fluorescent reporter fusions*

The strain OK510 was engineered for constructing mScarlet fusions. It is a DJ624 (MG1655 *AlacX74 mal::lacIq*) derivative that carries a *mini- $\lambda$ -Tet* prophage (3), which provides  $\lambda$  Red recombination functions that are induced at 42°C, and an *mScarlet* locus placed into the 6 bp intergenic region *argG-yhbX*. This locus (see Supplementary Figure S15) comprises a synthetic bidirectional transcriptional terminator L3S2P21 (TT1) (4), an inactive  $P_{\text{LtetO-1}}$  promoter (5) that is deprived of the -10 region, the *Pcat-cat-sacB* cassette expressed in the opposite direction to that of following 'mScarlet region (mScarlet-I ORF missing the translation initiation codon), and the *nptII* ORF, which is transcriptionally coupled to 'mScarlet and flanked by two FRT sites. The FRT sites allow for optional

elimination of the *nptII* ORF via Flp-FRT recombination. The last element of the locus is a natural bidirectional transcriptional terminator, ECK120026481 (TT2) (4). Hence, the strain features Tet<sup>R</sup> (due to the presence of *mini-λ-Tet*), Sucr<sup>S</sup>, Cam<sup>R</sup> and Kan<sup>S</sup> as both '*mScarlet* and *nptII* genes are not expressed.

The construction of *mScarlet* fusions was made with PCR cassette containing ~40 bp homologies on both ends that allow for recombining with its 5'-end within the inactive P<sub>LtetO-1</sub> restoring the -10 region, and with its 3'-end within the '*mScarlet* (restoring the translation initiation codon), so that it replaces the Pcat-*cat-sacB* sequences. This generates a translational fusion to *mScarlet*, which is expressed from a strong constitutive (in the absence of the Tet repressor) promoter P<sub>LtetO-1</sub> and provides expression of the downstream *nptII* ORF that renders the recombinants resistant to kanamycin. Thus, the recombinants can be selected for both resistance to sucrose and kanamycin, which greatly reduces occurrence of false-positive clones as compared to selection on sucrose alone. Selection at 37°C also facilitates elimination the *mini-λ-Tet* prophage in the majority of recombinants.

This OK510 strain was made through multiple steps of recombineering, summarized in Supplementary Figure S15. First, a *cat-sacB* cassette was amplified in 3 steps in order to add upstream the inactive P<sub>LtetO-1</sub> promoter lacking the -10 region, as well as upstream and downstream transcription terminators (TT1 and TT2, respectively) and homology regions to the *argG/yhbX* locus. The first step PCR template was the genomic DNA of a strain carrying a *cat-sacB* cassette and the primers used are (i) Ptetno-10-cat-for and Ter-catsacRev (1st step), (ii) Ter-Ptet-for and yhbX-Ter-rev (2nd step = reamplification of PCR of 1st step) and (iii) *argG*-Ter-for and yhbX-Ter-rev (3rd step = reamplification of PCR of 2nd step). This last PCR product was recombined in strain MG1432 and recombinants were selected on LB-Cam at 30°C, and then checked for sucrose sensitivity and Tet resistance (to ensure that they kept the *mini-λ Tet* for further recombineering). The structure of the locus was checked by sequencing and the resulting strain was called MG2346. In a second recombineering step, the *nptII* gene followed by an FRT site (PCR product amplified from genomic DNA with primers *sacB*-KanR-For and FRT-*sacB*-Rev) was introduced downstream of the *sacB* gene, giving rise to the strain MG2348 after selection on Kan and

sequencing of the locus. The third step consisted in replacing the *cat-sacB* cassette by the mScarlet gene devoid of the start codon, and followed by an FRT site. This was again done by recombineering, into strain MG2348 this time, using a PCR product amplified from the pNF02-mScI plasmid (a gift from N. Fraikin and L. Van Melderen, (6)) with primers Ptetno-10-mSC-For and mSc-FRT-Rev, and then reamplified with primers Ptet-55-12For and postFRT-KanR-Rev to increase the length of the homology regions. Recombinants were selected at 30°C on BS plates, and checked for CamS and TetR. Clones whose structure of this TT1-Ptet(no-10)-‘mScarlet(no AUG)-FRT-nptII-FRT-TT2 region was confirmed by sequencing were found to be KanS; out of those, strain MG2352 was used for the subsequent step.

At the last step, the P*cat-cat-sacB* cassette, made with oligos AK411 and AK412 using chromosomal DNA of NC397 strain (7) as a template, was recombined into MG2352 with subsequent selection of recombinants on LB-Cam plates at 30°C giving rise to the strain OK509. To avoid mutations that could have accumulated upon multiple recombineering passages during construction of the OK509 strain, the ‘*mScarlet*’ locus of OK509 was transferred into the initial strain, MG1432, selecting transductants on LB-Cam plates at 30°C. The resulting strain, OK510, was used for construction of the mScarlet fusions used in this study.

#### *mScarlet fusions construction*

To obtain P<sub>LtetO-1</sub>-*sdhC*<sub>-222+39</sub>-*mScarlet*<sub>+4</sub>, P<sub>LtetO-1</sub>-*ompR*<sub>-35+717</sub>-*mScarlet*<sub>+4</sub>, and P<sub>LtetO-1</sub>-*btuB*<sub>-240+210</sub>-*mScarlet*<sub>+4</sub>, corresponding *loci* of MG1655 chromosome were PCR amplified with following pairs of oligos: Ptet-*sdhC*-222for and *sdhC*+39-mScrev (then, re-amplified with Ptet-55-12For and *sdhC*+39-mScrev); 5'PtetompR-35+30-lacZ and *ompR*+717-mScrev (then, re-amplified with Ptet-55-12For and *ompR*+717-mScrev); 5'Ptet*BtuB*-240 and AK451 (then, re-amplified with Ptet-55-12For and AK420). Resulting PCR products were recombined into the OK510 strain. Recombinants were selected at 37°C on BS plates supplemented with 6 µg/mL kanamycin. The recombinant colonies were checked for fluorescence and sensitivity to tetracycline (elimination of the *mini-λ-Tet*). The upstream

*mScarlet* regions of the obtained OK528, OK529 and OK572 strains were sequenced with oligos AK387 and AK418.

### *lacZ* fusions construction

Construction of *lacZ* fusions was done by replacing a *cat-sacB* cassette upstream of *lacZ* by recombineering into strain PM1205 ((8), for construction of P<sub>BAD</sub> driven fusions) or MG1508 ((9), for construction of P<sub>LtetO-1</sub> driven fusions) and OK868 (an MG1508 variant with the  $\Delta lacY::FRT$  deletion). At low IPTG concentrations, its intracellular levels are largely dependent on the LacY-mediated uptake. As *lacZ* and *lacY* are co-expressed, the LacY levels (and IPTG uptake activity) vary according to the *lacZ* fusion activity. To uncouple the intracellular IPTG levels from the activity of a *lacZ* fusion, *i.e.* to provide equal induction conditions in different *lacZ* fusion strains,  $\Delta lacY::FRT$  background was used (for Supplementary Figure S12). To this end, the  $\Delta lacY::FRT-nptII-FRT$  allele was PCR amplified from JW0334 chromosome using AK51 and AK52 primers, and the resulting PCR product was recombined into MG1508, selecting on Kan (generating OK865). The *nptII* was eliminated from OK865 via Flp-FRT recombination (leaving  $\Delta lacY::FRT$  scar) using pCP20 plasmid giving rise to OK866. Then, the P<sub>LtetO-1</sub>-*cat-sacB-lacZ- $\Delta lacY::FRT$*  region was transferred into MG1432 via P1 transduction selecting on Cam (at 30°C, to preserve the *mini- $\lambda$ -Tet*), and the obtained  $\Delta lacY::FRT$  version of MG1508 was referred to as OK868.

In general, the PCR products were obtained using MG1655 genomic DNA as a template, and, when needed, the length of the homology regions was extended by re-amplification with primers Ptet-55-12For or lacZ28-66rev as necessary. The mutations EP1, EP2, EP3, M9, M11 and mutH1 were present on the primers, and the same was true for the lowP<sub>LtetO-1</sub> mutant that changes the -35 region consensus of P<sub>LtetO-1</sub> from TTGACA into TGGACA. For the construction of the P<sub>BAD</sub>-*btuB-lacZ* transcriptional fusions, successive PCR reactions introduced, downstream of the selected *btuB* region, an in-frame sequence encoding a DPAF peptide terminated by a stop codon, followed by *lacZ* sequence starting 17 nts before *lacZ* translation initiation codon.

To produce  $\Delta lacY::FRT$  versions of the *lacZ* fusions, the fusion regions were PCR amplified with primers Ptet-55-12For and lacZ28-66rev using corresponding WT *lacY* fusion strains chromosome as a template. The PCR products were recombineered into OK868.

$P_{LtetO-1}$ -driven versions of the transcriptional fusions were obtained by recombineering in MG1508. In each case, a relevant PCR product for recombineering was made in two steps: 1) amplification of the fusion region with primers 5'PtetBtuB-240 and lacZ28-66rev using a corresponding  $P_{BAD}$ -driven fusion strain chromosome as a template, and 2) re-amplification of the step 1 PCR product with Ptet-55-12For and lacZ28-66rev.

Recombinants were selected on BS plates supplemented with 0.002% X-gal at 37°C, picking blue colonies and checking them for sensitivity to chloramphenicol (loss of the *cat-sacB* cassette) and tetracycline (loss of the *mini- $\lambda$ -Tet*). The *lac* loci of resulting strains were verified by sequencing.

#### *Constructing rne131 derivatives of transcriptional $P_{LtetO-1}$ -btuB-lacZ fusion strains*

The *rne131* allele is commonly co-transduced with the *zhe-726::Tn10* which allows selection of tetracycline resistant transductants, which would contain the *rne131* allele at approximately 50% frequency. Unfortunately, the  $P_{LtetO-1}$  promoter was designed to be repressed by the TetR repressor of *Tn10*. To provide constitutive expression of the  $P_{LtetO-1}$ -*btuB-lacZ* fusions in the *rne131* context, we first transferred the *rne131/zce726::Tn10* from the HfrG6 $\Delta lac12$ RevES191 *rne131 zce-726::Tn10* strain into DJ624 generating OK837. Then, the *zce726::Tn10* was replaced by the  $\Delta ptsG::FRT-nptIII-FRT$  of JW1087 via P1 transduction giving rise to OK838. The *rne131/ $\Delta ptsG::FRT-nptIII-FRT$*  region was then transferred into the  $P_{LtetO-1}$ -*btuB-lacZ* fusion strains selecting on Kan. As *rne131* is also co-transduced with ~50% frequency, both *rne131* and WT *rne* transductants were obtained (see OK855-OK860), which were used for the experiments in Supplementary Figure S4C. Thus both, the WT and the *rne131* strains there carried the  $\Delta ptsG::FRT-nptIII-FRT$  allele.

### *Constructing omrA and omrB and omrAB deletion strains*

PCR cassettes for generating  $\Delta omrA::nptI$  and  $\Delta omrB::nptI$  were obtained using pairs of primers, OmrA-kan5 + OmrA-Kan3 and OmrB-kan5 + OmrB-kan3, respectively. As a template, chromosomal DNA of a strain carrying an *nptI* gene was used. The cassettes were recombined into NM300 strain selecting recombinants on LB-Kan at 37°C. Loss of mini- $\lambda$ -Tet was verified by sensitivity to Tet. The deletions in resulting strains MG1001 ( $\Delta omrA::nptI$ ) and MG1002 ( $\Delta omrB::nptI$ ) were verified by PCR and sequenced with oligos seqOmrBfor and seqOmrArev. The obtained  $\Delta omrA::nptI$  and  $\Delta omrB::nptI$  and the previously published double deletion  $\Delta omrAB::nptI$  of MG1003 (10) were transferred to JJ416, generating OK615, OK616 and JJ426, respectively. Same deletions were transferred to JJ425 giving rise to OK617, OK618, and JJ427, respectively.

### *Elimination of the nptII ORF from FRT-nptII-FRT cassettes*

Unnecessary *nptII* ORFs originating from the OK510 derivatives and from Keio collection knockouts (11) used in this study were eliminated *via* Flp-FRT recombination. To this end, cells were transformed with the pCP20 plasmid (12). The plasmid provides *in trans* synthesis of flippase (Flp) and possesses a thermo-sensitive replication origin. Transformants were selected at 30°C on LB-Cam (10  $\mu$ g/mL) plates supplemented with chloramphenicol and purified once on the same medium. Then, an individual transformant colony was grown overnight in 10 mL of LB medium at 42°C and plated on LB at  $\sim 10^2$  cfu per plate 37°C. After such passage vast majority of clones were both Kan<sup>S</sup> and Cam<sup>S</sup>.

### *Constructing Hfq variant strains carrying the mScarlet fusions under study*

The construction of strains carrying different *hfq* mutations is based on (13), with minor modifications to combine these different alleles with mScarlet fusions. First, the  $\Delta argG::FRT-nptII-FRT$  allele was transferred from JW3140 (from the Keio collection (11)) to DJ624 by P1 transduction to generate strain OK523. This OK523 strain was then cured of *nptII* as described above generating OK530. The  $\Delta hfq::cat-sacB$  allele was co-transduced with nearby *purA::FRT-nptII-FRT* from DJS2604 (from D. Schu, NIH) to OK530 selecting on LB-Cam, thus giving rise to OK564. The *hfq* alleles were transferred

from DJS2609 (*hfq* WT), DJS2927 ( $\Delta hfq$ ), KK2560 (*hfqQ8A*), KK2561 (*hfqR16A*), and KK2562 (*hfqY25D*) to OK564 selecting transductants on minimal medium A-agar plates (16) supplemented with 0.2% (w/v) of glucose and 20  $\mu\text{g}/\text{mL}$  of L-arginine (the acceptor strain, OK564, is a purine and arginine auxotroph). Transfer of the *hfq* alleles was verified by PCR with *hfq* check oligos mHfqout and antiHfqout, or with the mHfqout and one of the *hfq* point mutant-specific oligos, AK430 (Q8A-specific), AK431 (R16A-specific), and AK432 (Y25D-specific). The resulting strains, OK581 (*hfq* WT), OK582 ( $\Delta hfq$ ), OK583 (*hfqQ8A*), OK584 (*hfqR16A*), and OK585 (*hfqY25D*), served as acceptors for transferring the mScarlet fusion variants. To do so, the fusion strains OK528, OK529 and OK572 were cured of the *nptII* cassette, thus generating strains OK560, OK561 and OK577, respectively. Then, each fusion was transduced into the five *hfq* variant strains. Arginine prototroph transductants were selected at 37°C on minimal A-agar plates supplemented with 0.2% glucose (mScarlet locus is 100% co-transduced with the wild type *argG* allele). The resulting strains, OK586 to OK605, are listed in the Supplementary Table S1.

#### *Cloning Hfq under an IPTG-inducible promoter*

A pCAS18 plasmid was given by M. Springer. It carries *E. coli rpsR* gene that was cloned in a pCA24N (14) using *BseRI* and *HindIII* restriction sites (*SaII* site is present between the *rpsR* stop codon and *HindIII* site). A unique *NdeI* restriction site was made at the *rpsR* start codon in pCAS18 by PCR with primers AK74 and AK75 giving rise to pCAS18n. Then, a 233 bp *NdeI-SaII* region of pCAS18n containing *rpsR* was replaced by a 354 bp Hfq-containing fragment of the pHfq (15). The resulting plasmid that provides IPTG-induced expression of Hfq was referred to as pNK139. Thus, the pNK139 allows IPTG-inducible synthesis of Hfq from the  $P_{T5-lac}$  promoter, using host RNA polymerase. This provides an opportunity to observe the dose-dependent effect of Hfq on cellular processes such as model fusion expression.

#### *Fluorescence measurements to assess the expression of mScarlet fusions*

The *hfq* variant strains OK586-OK590 ( $P_{\text{LtetO-1}}\text{-}btuB\text{-}240+210\text{-}mScarlet_{+4}$ ), and OK601-OK605 ( $P_{\text{LtetO-1}}\text{-}ompR\text{-}35+717\text{-}mScarlet_{+4}$ ) were transformed with the pBRplac vector control, pOmrA and pOmrB. The  $P_{\text{LtetO-1}}\text{-}sdhC\text{-}222+39\text{-}mScarlet_{+4}$  *hfq* variant strains (OK596-



OK600) were transformed with pBRplac and pSpot42. In each case transformants were selected on LB-Tet plates at 37°C. DJ624 transformed with pBRplac was utilized as a no-fusion background. After a single purification on the LB-Tet plate, individual transformant colony was inoculated with 400 µL of CAG medium (minimal A salts (16), 0.5% (w/v) glycerol, 0.25% (w/v) casamino acids, 1 mM MgSO<sub>4</sub>) supplemented with Tet and incubated overnight with shaking at 37°C. Next day, 0.4 µL of saturated culture used to inoculate 200 µL of CAG medium supplemented with Tet and 0.25 mM IPTG in the black 96 well µCLEAR F-bottom plate (Greiner, 655090) covered with 50 µl of mineral oil (Sigma, M8410).

Test was run in the CLARIOSar<sup>PLUS</sup> plate reader (BMG Labtech) at 37°C and 500 RPM. Absorbance at 600 nm and fluorescence (excitation at 560±15 nm, emission at 600±15 nm with 580 nm dichroic filter) was measured every 12 minutes for 16 h. Each experiment was made in triplicate (starting from three independent transformant colonies). Experimental curves expressed as fluorescence normalized to absorbance at 600 nm (normalized fluorescence) versus absorbance at 600 nm are shown in the Supplementary Figures S5 and S7-S11. To generate the histograms, the mean normalized fluorescence and standard deviations were calculated for the three (one per triplicate) time points closest to apparent A<sub>600</sub>=0.3. Mean normalized fluorescence of the no-fusion control was calculated accordingly and subtracted from the experimental data.

## References

1. Sawitzke, J.A., Thomason, L.C., Costantino, N., Bubunencko, M., Datta, S. and Court, D.L. (2007) Recombineering: in vivo genetic engineering in *E. coli*, *S. enterica*, and beyond. *Methods in enzymology*, **421**, 171–99.
2. Thomason, L.C., Costantino, N. and Court, D.L. (2007) *E. coli* genome manipulation by P1 transduction. *Current protocols in molecular biology*, **1**, 1.17.1-1.17.8.
3. Court, D.L., Swaminathan, S., Yu, D., Wilson, H., Baker, T., Bubunencko, M., Sawitzke, J. and Sharan, S.K. (2003) Mini-lambda: a tractable system for chromosome and BAC engineering. *Gene*, **315**, 63–9.
4. Chen, Y.-J., Liu, P., Nielsen, A.A.K., Brophy, J.A.N., Clancy, K., Peterson, T. and Voigt, C.A. (2013) Characterization of 582 natural and synthetic terminators and quantification of their design constraints. *Nature methods*, **10**, 659–64.

5. Lutz,R. and Bujard,H. (1997) Independent and tight regulation of transcriptional units in *Escherichia coli* via the LacR/O, the TetR/O and AraC/I1-I2 regulatory elements. *Nucleic acids research*, **25**, 1203–10.
6. Fraikin,N., Rousseau,C.J., Goeders,N. and Van Melderen,L. (2019) Reassessing the Role of the Type II MqsRA Toxin-Antitoxin System in Stress Response and Biofilm Formation: mqsA Is Transcriptionally Uncoupled from mqsR. *mBio*, **10**, e0267819.
7. Svenningsen,S.L., Costantino,N., Court,D.L. and Adhya,S. (2005) On the role of Cro in lambda prophage induction. *Proceedings of the National Academy of Sciences of the United States of America*, **102**, 4465–9.
8. Mandin,P. and Gottesman,S. (2009) A genetic approach for finding small RNAs regulators of genes of interest identifies RybC as regulating the DpiA/DpiB two-component system. *Mol Microbiol*, **72**, 551–565.
9. Coornaert,A., Chiaruttini,C., Springer,M. and Guillier,M. (2013) Post-transcriptional control of the *Escherichia coli* PhoQ-PhoP two-component system by multiple sRNAs involves a novel pairing region of GcvB. *PLoS genetics*, **9**, e1003156.
10. Guillier,M. and Gottesman,S. (2006) Remodelling of the *Escherichia coli* outer membrane by two small regulatory RNAs. *Mol Microbiol*, **59**, 231–247.
11. Baba,T., Ara,T., Hasegawa,M., Takai,Y., Okumura,Y., Baba,M., Datsenko,K.A., Tomita,M., Wanner,B.L. and Mori,H. (2006) Construction of *Escherichia coli* K-12 in-frame, single-gene knockout mutants: the Keio collection. *Molecular systems biology*, **2**, 2006.0008.
12. Cherepanov,P.P. and Wackernagel,W. (1995) Gene disruption in *Escherichia coli*: TcR and KmR cassettes with the option of Flp-catalyzed excision of the antibiotic-resistance determinant. *Gene*, **158**, 9–14.
13. Zhang,A., Schu,D.J., Tjaden,B.C., Storz,G. and Gottesman,S. (2013) Mutations in interaction surfaces differentially impact *E. coli* Hfq association with small RNAs and their mRNA targets. *Journal of molecular biology*, **425**, 3678–97.
14. Kitagawa,M., Ara,T., Arifuzzaman,M., Ioka-Nakamichi,T., Inamoto,E., Toyonaga,H. and Mori,H. (2005) Complete set of ORF clones of *Escherichia coli* ASKA library (a complete set of *E. coli* K-12 ORF archive): unique resources for biological research. *DNA Res*, **12**, 291–299.
15. Vassilieva,I.M., Rouzanov,M.V., Zelinskaya,N.V., Moll,I., Bläsi,U. and Garber,M.B. (2002) Cloning, purification, and crystallization of a bacterial gene expression regulator--Hfq protein from *Escherichia coli*. *Biochemistry Mosc.*, **67**, 1293–1297.
16. Miller,J.H. (1972) *Experiments in Molecular Genetics* Laboratory,C.S.H. (ed) Cold Spring Harbor Laboratory Press, NY, USA.

17. Madeira,F., Park,Y.M., Lee,J., Buso,N., Gur,T., Madhusoodanan,N., Basutkar,P., Tivey,A.R.N., Potter,S.C., Finn,R.D., *et al.* (2019) The EMBL-EBI search and sequence analysis tools APIs in 2019. *Nucleic acids research*, **47**, W636–W641.
18. Zuker,M. (2003) Mfold web server for nucleic acid folding and hybridization prediction. *Nucleic Acids Res*, **31**, 3406–3415.
19. Masse,E. and Gottesman,S. (2002) A small RNA regulates the expression of genes involved in iron metabolism in Escherichia coli. *Proc Natl Acad Sci U S A*, **99**, 4620–4625.
20. Masse,E., Escorcía,F.E. and Gottesman,S. (2003) Coupled degradation of a small regulatory RNA and its mRNA targets in Escherichia coli. *Genes Dev*, **17**, 2374–2383.
21. Bastet,L., Chauvier,A., Singh,N., Lussier,A., Lamontagne,A.-M.M., Prévost,K., Massé,E., Wade,J.T. and Lafontaine,D.A. (2017) Translational control and Rho-dependent transcription termination are intimately linked in riboswitch regulation. *Nucleic acids research*, **45**, 7474–7486.
22. Jagodnik,J., Chiaruttini,C. and Guillier,M. (2017) Stem-Loop Structures within mRNA Coding Sequences Activate Translation Initiation and Mediate Control by Small Regulatory RNAs. *Molecular cell*, **68**, 158-170.e3.
23. Ghosh,T., Jahangirnejad,S., Chauvier,A., Stringer,A.M., Korepanov,A.P., Cote,J.-P., Wade,J.T. and Lafontaine,D.A. (2024) Direct and Indirect Control of Rho-Dependent Transcription Termination by the Escherichia coli lysC Riboswitch. *RNA*, 10.1261/rna.079779.123.
24. Majdalani,N., Cuning,C., Sledjeski,D., Elliott,T. and Gottesman,S. (1998) DsrA RNA regulates translation of RpoS message by an anti-antisense mechanism, independent of its action as an antisilencer of transcription. *Proc Natl Acad Sci U S A*, **95**, 12462–12467.
25. Mandin,P. and Gottesman,S. (2010) Integrating anaerobic/aerobic sensing and the general stress response through the ArcZ small RNA. *The EMBO journal*, **29**, 3094–107.
26. Lerner,C.G. and Inouye,M. (1990) Low copy number plasmids for regulated low-level expression of cloned genes in Escherichia coli with blue/white insert screening capability. *Nucleic acids research*, **18**, 4631.
27. Ziolkowska,K., Derreumaux,P., Folichon,M., Pellegrini,O., Régnier,P., Boni,I.V. and Hajnsdorf,E. (2006) Hfq variant with altered RNA binding functions. *Nucleic acids research*, **34**, 709–20.
28. Bindels,D.S., Haarbosch,L., van Weeren,L., Postma,M., Wiese,K.E., Mastop,M., Aumonier,S., Gotthard,G., Royant,A., Hink,M.A., *et al.* (2017) mScarlet: a bright

monomeric red fluorescent protein for cellular imaging. *Nature methods*, **14**, 53–56.



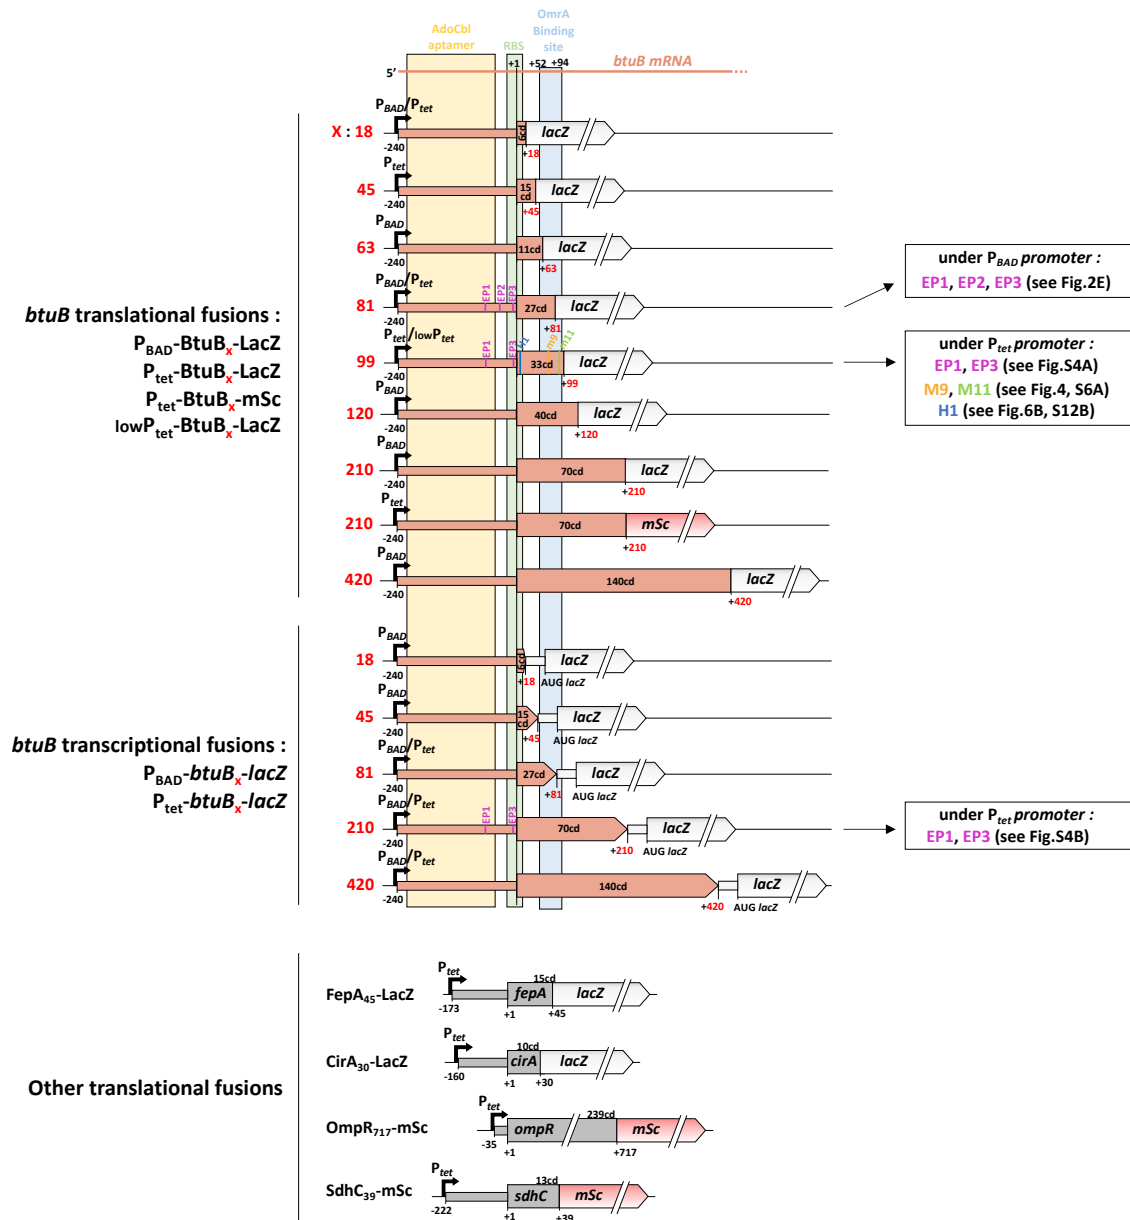

**Supplementary Figure S2. Schematics of reporter fusions used in this study.** The promoter, the riboswitch (AdoCbl aptamer), the ribosome binding site (RBS), the *btuB* and *lacZ* coding regions are shown. The *btuB* coding region (in nucleotides and codons) is indicated for each construct. The location of the OmrA binding site within the *btuB* coding region determined in this study is shown in blue. Arabinose-inducible ( $P_{BAD}$ ) or

constitutive  $P_{LtetO-1}$  ( $P_{tet}$ ) promoter is indicated. Transcriptional fusions contain a stop codon following the *btuB* coding region and an additional Shine-Dalgarno (SD) and AUG start codon for *lacZ* expression.

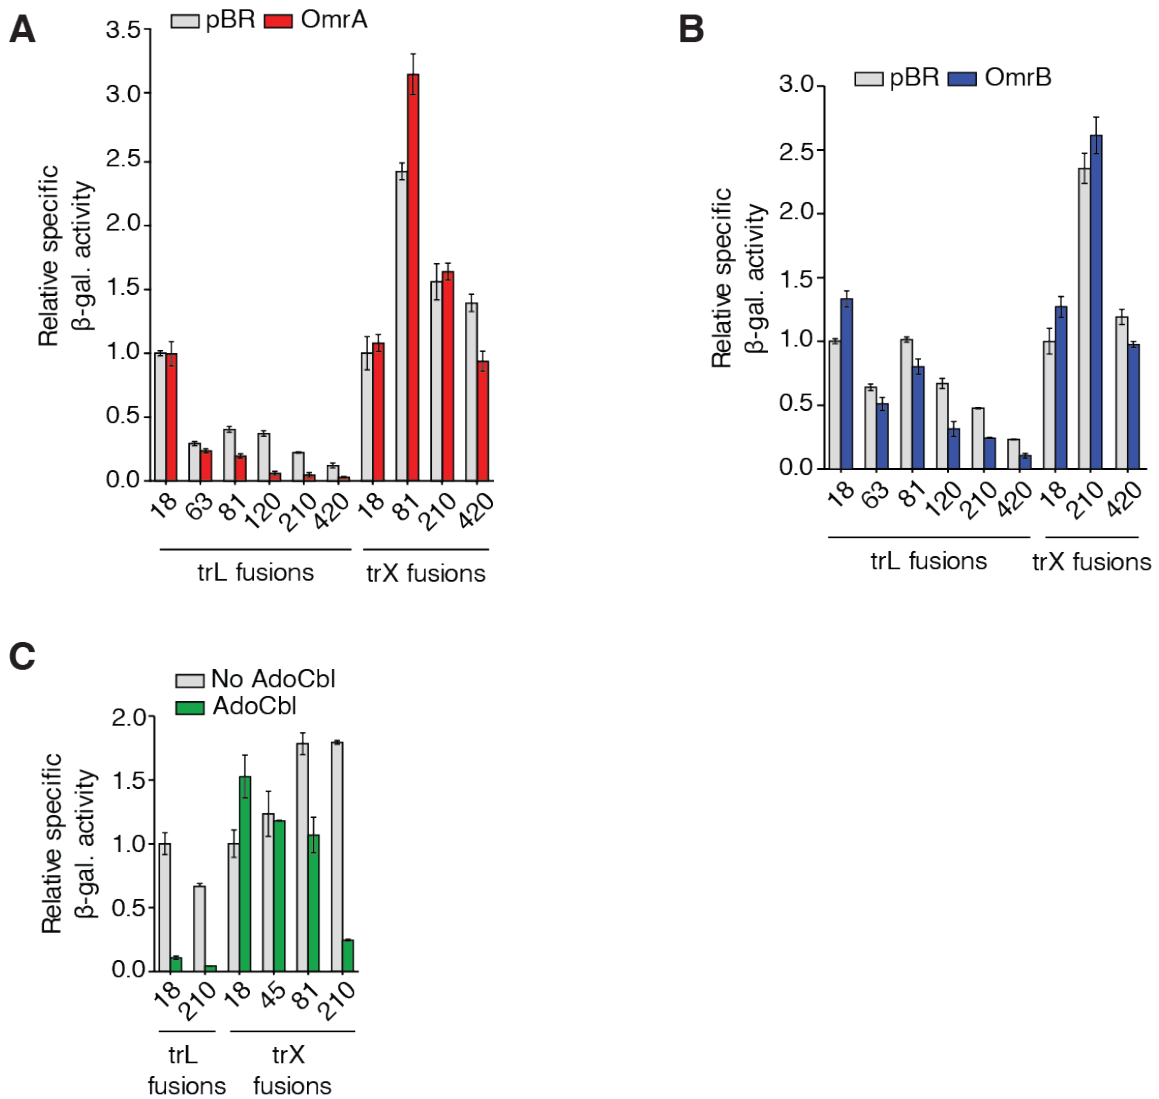

**Supplementary Figure S3. sRNA and riboswitch regulation of *btuB* expression.** (A-C)  $\beta$ -galactosidase assays of translational BtuB-LacZ (trL) and transcriptional *btuB-lacZ* (trX) fusions with OmrA (A), OmrB (B) or AdoCbl (C). The number of nucleotides of *btuB* ORF is indicated for each construct. In each set (trL or trX), the expression of a construct is normalized to the expression of the corresponding 18 nt fusion. This figure represents the normalized data that are in Figures 2B, 2C and 2D.



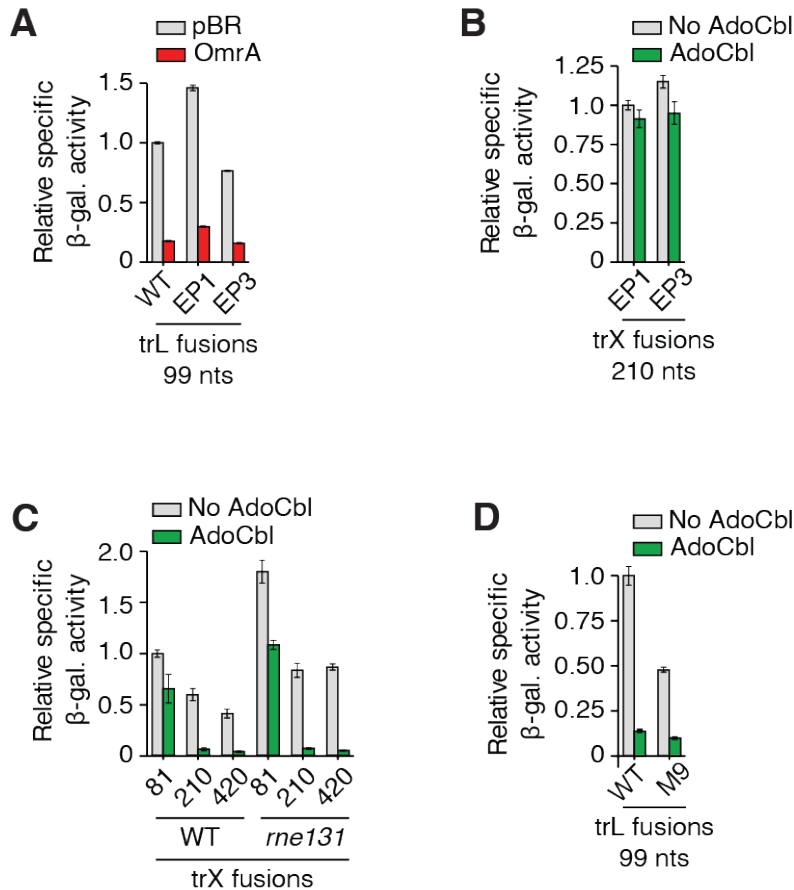

**Supplementary Figure S4. Characterization of the molecular mechanism of riboswitch-dependent regulation of *btuB* expression.** (A)  $\beta$ -galactosidase assays of translational EP1 and EP3 *BtuB-LacZ* (trL) fusions with and without OmrA. (B)  $\beta$ -galactosidase assays of transcriptional EP1 and EP3 *btuB-lacZ* (trX) fusions with and without AdoCbl. (C)  $\beta$ -galactosidase assays of transcriptional *btuB-lacZ* (trX) fusions with and without AdoCbl in WT and *rne131* mutant strain. The number of nucleotides of *btuB* ORF is indicated for each construct. (D)  $\beta$ -galactosidase assays of translational WT and M9 *BtuB-LacZ* (trL) fusions with and without AdoCbl.

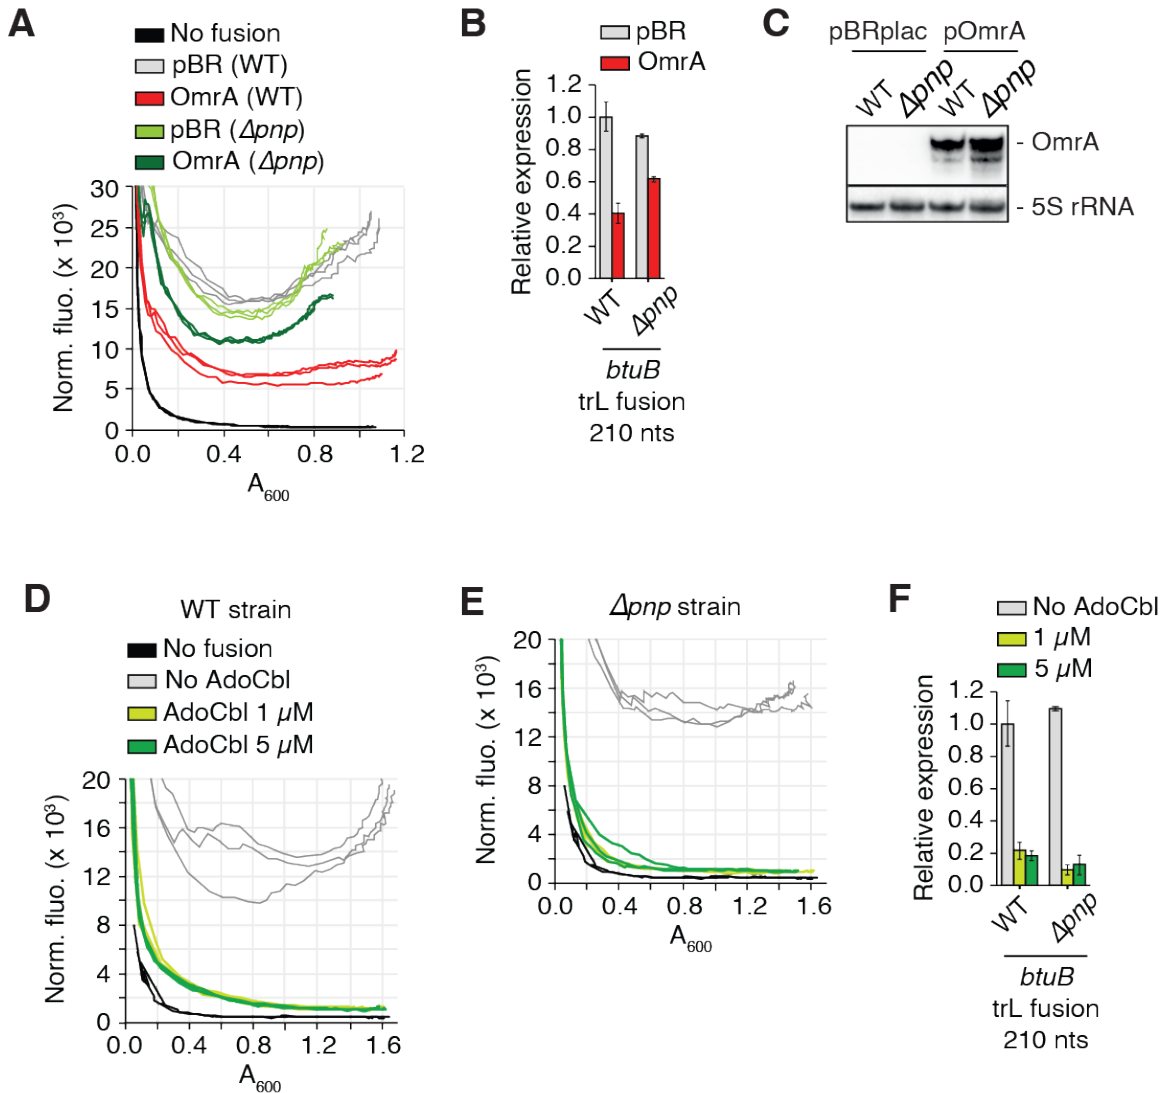

**Supplementary Figure S5. The control of *btuB* by OmrA is impaired in the absence of PNPase.** (A) The fluorescence of the BtuB<sub>210</sub>-mScarlet translational fusion was followed in WT and *pnp* deleted cells, transformed with a vector control (pBR) or an OmrA overproducing plasmid. The fluorescence of a strain that does not express the mScarlet gene was followed as a control for the fluorescence background. The curves show normalized fluorescence plotted against the absorbance at 600 nm for all samples (in triplicate). (B) The average value and standard deviation of normalized fluorescence at an absorbance of 600 nm closest to 0.3 is shown on the histograms. (C) The levels of OmrA

in WT or *pnp* deleted cells were analyzed by Northern-blot in an independent experiment. **(D, E, F)** The fluorescence of the BtuB<sub>210</sub>-mScarlet fusion was measured in WT **(D)** or *pnp* deleted cells **(E)** grown in the absence or in the presence of AdoCbl at a final concentration of 1 or 5  $\mu$ M. Graphic representation is as in panel **A**, and data from panels **D** and **E** are processed and summarized on panel **F** the same way as for panel **B**.

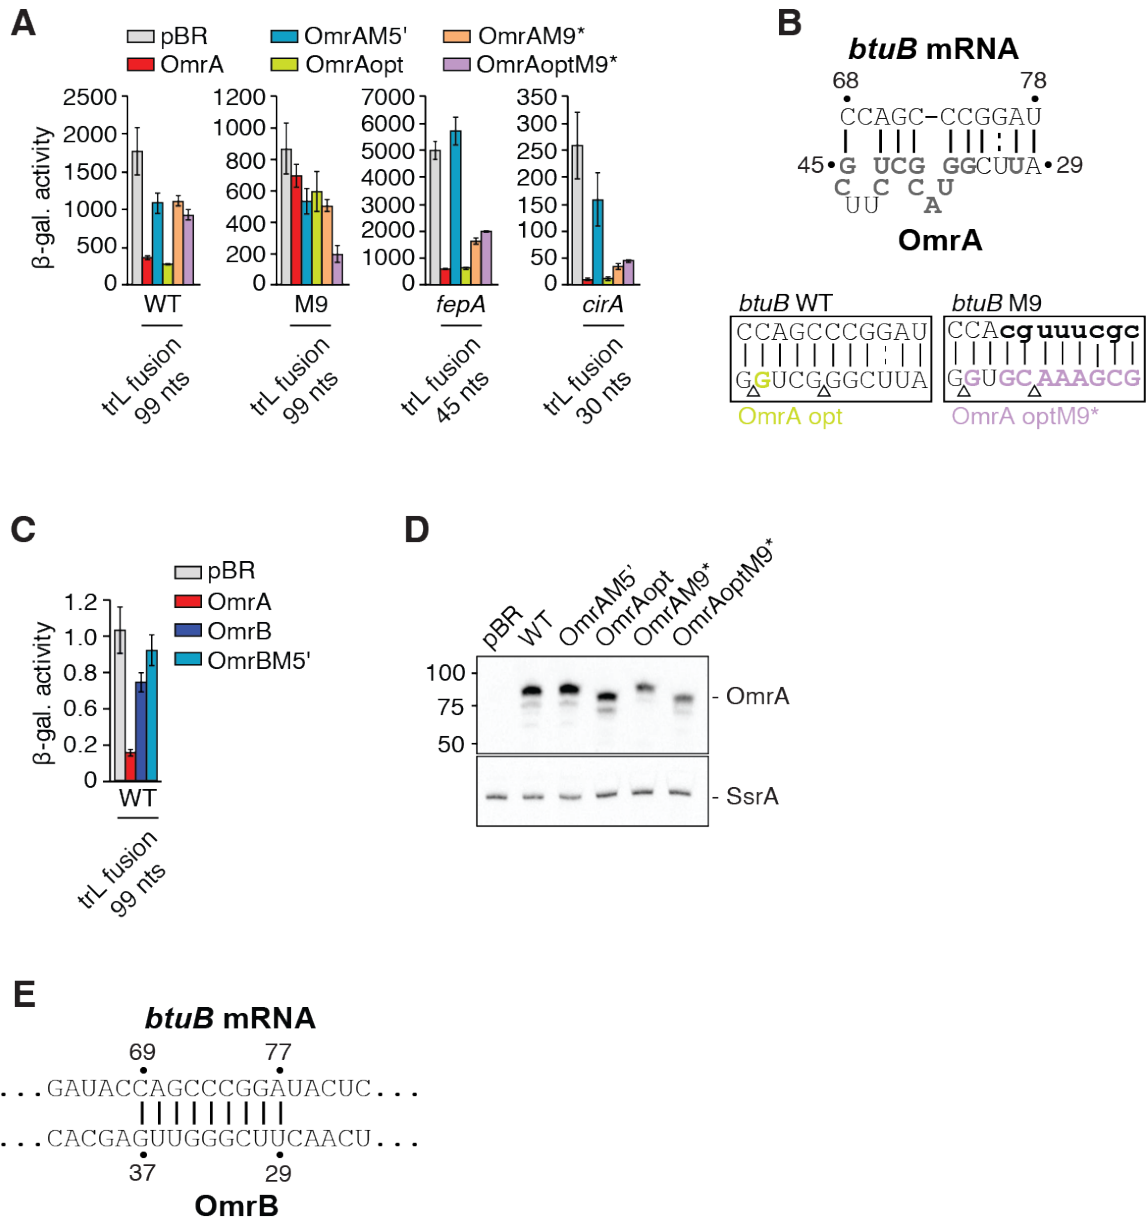

**Supplementary Figure S6. Sequence changes in the 5' end and central region of OmrA modulate *btuB* regulation.** (A) Beta-galactosidase assays of BtuB<sub>99</sub>-LacZ (WT and M9 mutant), FepA<sub>45</sub>-LacZ and CirA<sub>30</sub>-LacZ translational fusions upon overproduction of different OmrA variants. The  $\beta$ -galactosidase average values (in Miller units) and the standard deviations were obtained from three independent experiments. All fusions are expressed from a P<sub>LtetO-1</sub> constitutively expressed promoter. (B) Predicted OmrA-*btuB* interactions are shown for key sRNA-mRNA base-pairs for the WT and OmrAopt, as well

as for *btuB* M9 mutant and OmrAoptM9\*. Lowercase and colored nucleotides represent mutations introduced in *btuB* M9 and OmrA, respectively; deletion of nts in OmrAopt is indicated by the triangles. **(C)** Beta-galactosidase assays of WT BtuB<sub>99</sub>-LacZ translational fusion upon overproduction of OmrA (WT) and OmrB (WT and M5' variant) sRNAs. **(D)** Northern blot analysis of levels of OmrA variants using RNA extracted from cell cultures used for corresponding  $\beta$ -galactosidase assays. Detection of the SsrA RNA was used as a loading control. **(E)** IntaRNA predicted interaction between OmrB and the first 100 nts of *btuB* coding region.

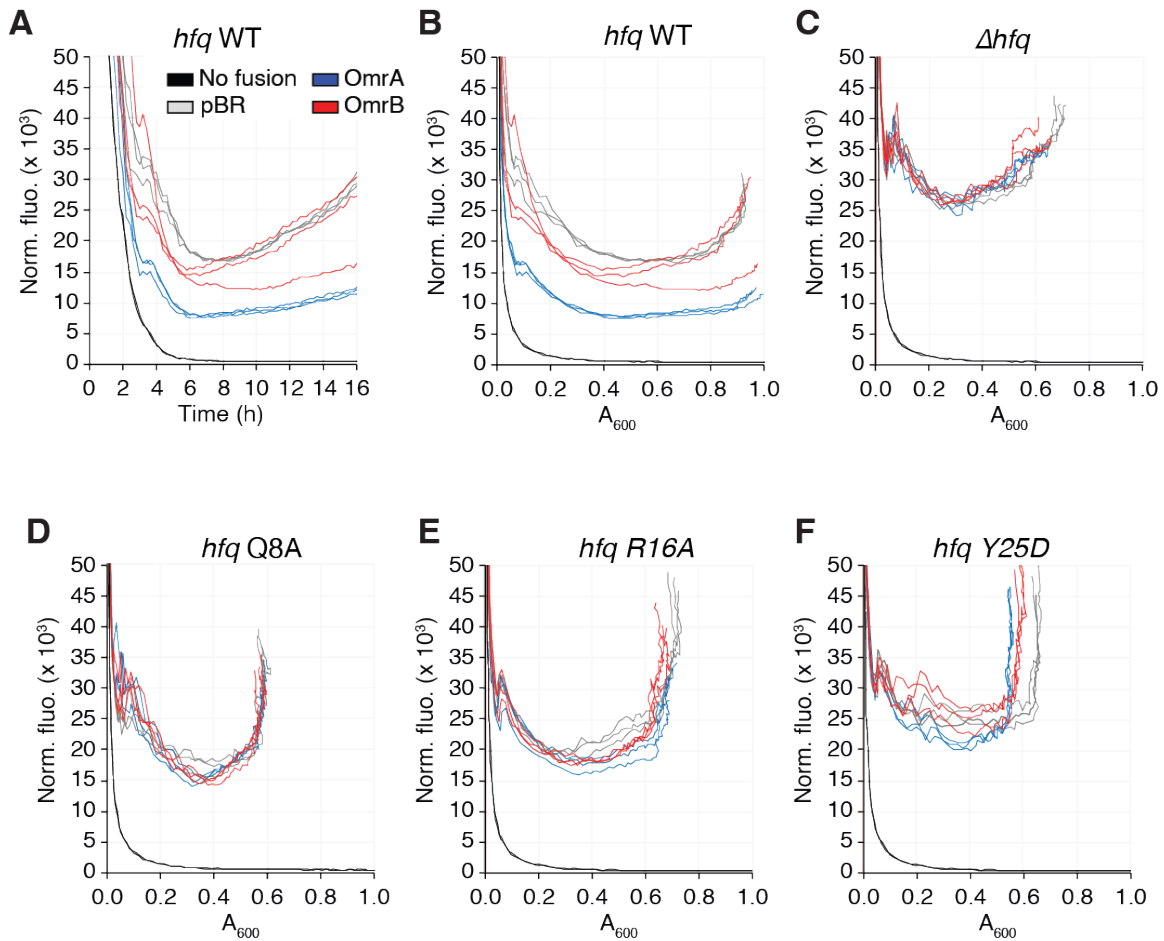

**Supplementary Figure S7. Fluorescence assays using the BtuB<sub>210</sub>-mScarlet fusion.**

The normalized fluorescence is shown versus time (A) or versus the absorbance at 600 nm (B) for the WT strain, and only as a function of absorbance for the other strains (C-F). Experiments were performed when overexpressing OmrA, OmrB or when using the empty vector (pBR). A control was performed as a strain without the fluorescent construct transformed with the blank vector (no fusion). Experiments were performed in the WT strain (*hfq* WT) (A),  $\Delta hfq$  (B), *hfq* Q8A (C), *hfq* R16A (D) and *hfq* Y25D (E). These raw data were used to calculate the relative FPA (fluorescence per absorbance) shown in Figure 5B.

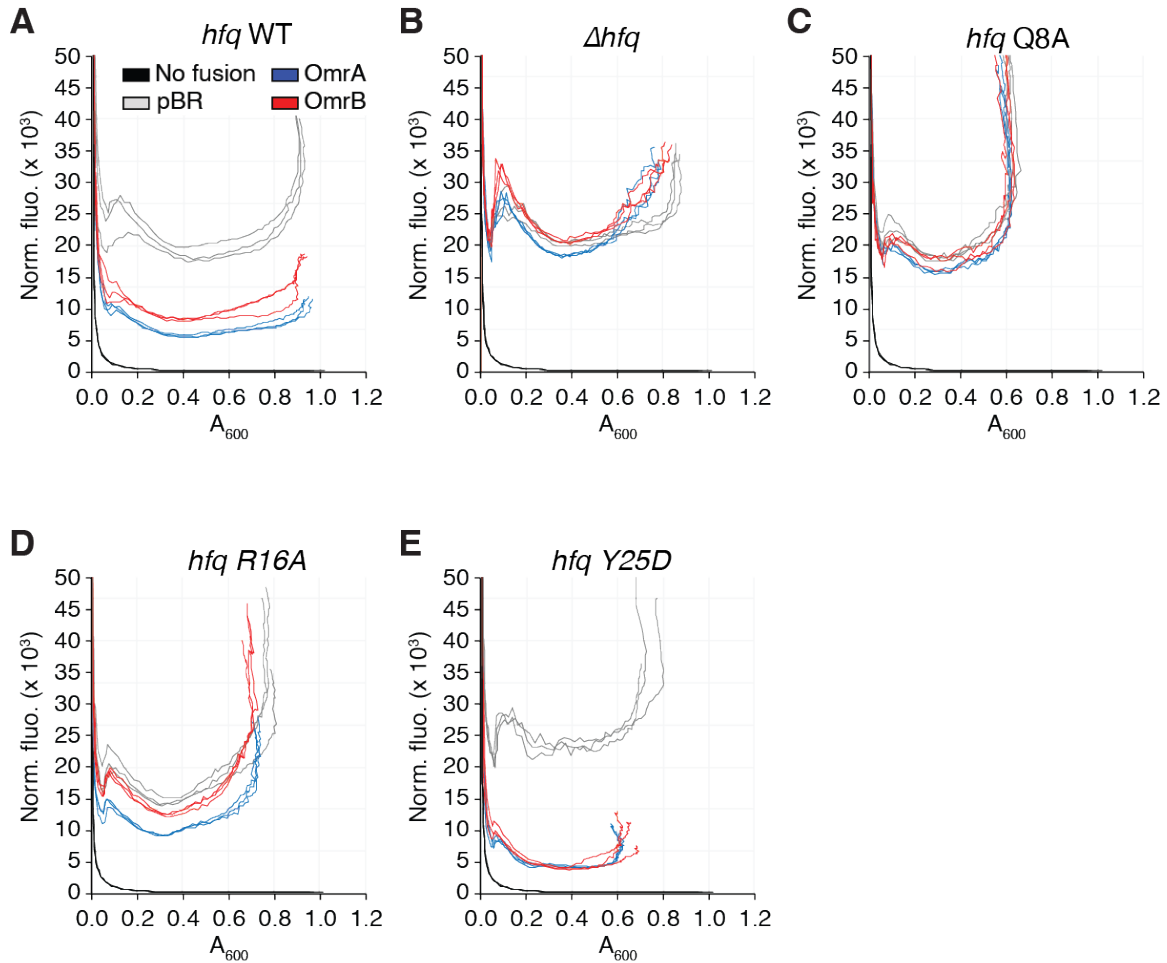

**Supplementary Figure S8. Fluorescence assays using the OmpR<sub>717</sub>-mScarlet fusion.**

**(A-E)** Experiments were performed when overexpressing OmrA, OmrB or when using the empty vector (pBR). The no fusion control was as in Supplementary Figure S7. Experiments were performed in the WT strain (*hfq* WT) **(A)**,  $\Delta$ *hfq* **(B)**, *hfq* Q8A **(C)**, *hfq* R16A **(D)** and *hfq* Y25D **(E)**. These raw data were used to calculate the relative FPA (fluorescence per absorbance) shown in Figure 5C.

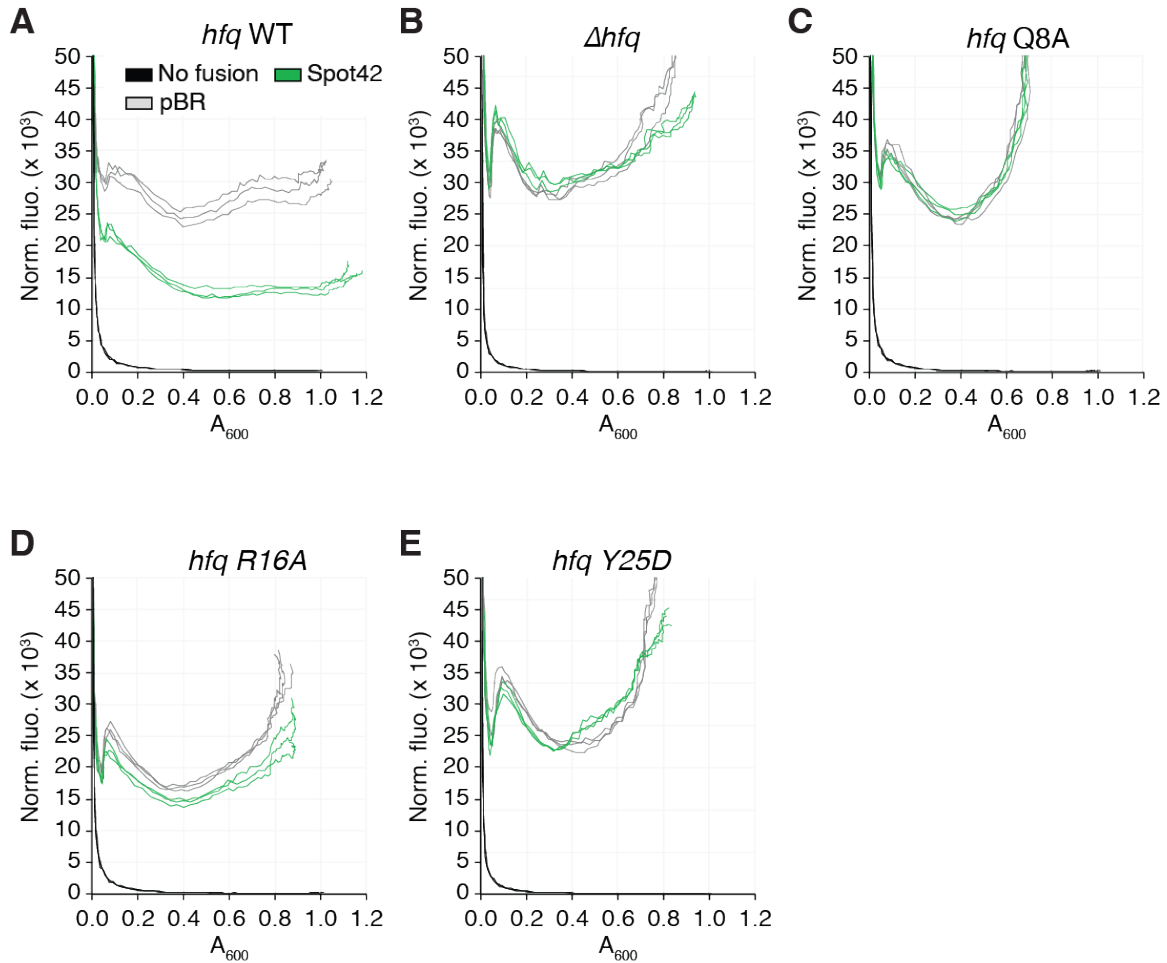

**Supplementary Figure S9. Fluorescence assays using the SdhC<sub>39</sub>-mScarlet fusion. (A-E)** Experiments were performed when overexpressing Spot42 or when using the empty vector (pBR). The no fusion control was as in Supplementary Figure S7. Experiments were performed in the WT strain (*hfq* WT) (A),  $\Delta hfq$  (B), *hfq* Q8A (C), *hfq* R16A (D) and *hfq* Y25D (E). These raw data were used to calculate the relative FPA (fluorescence per absorbance) shown in Figure 5D.



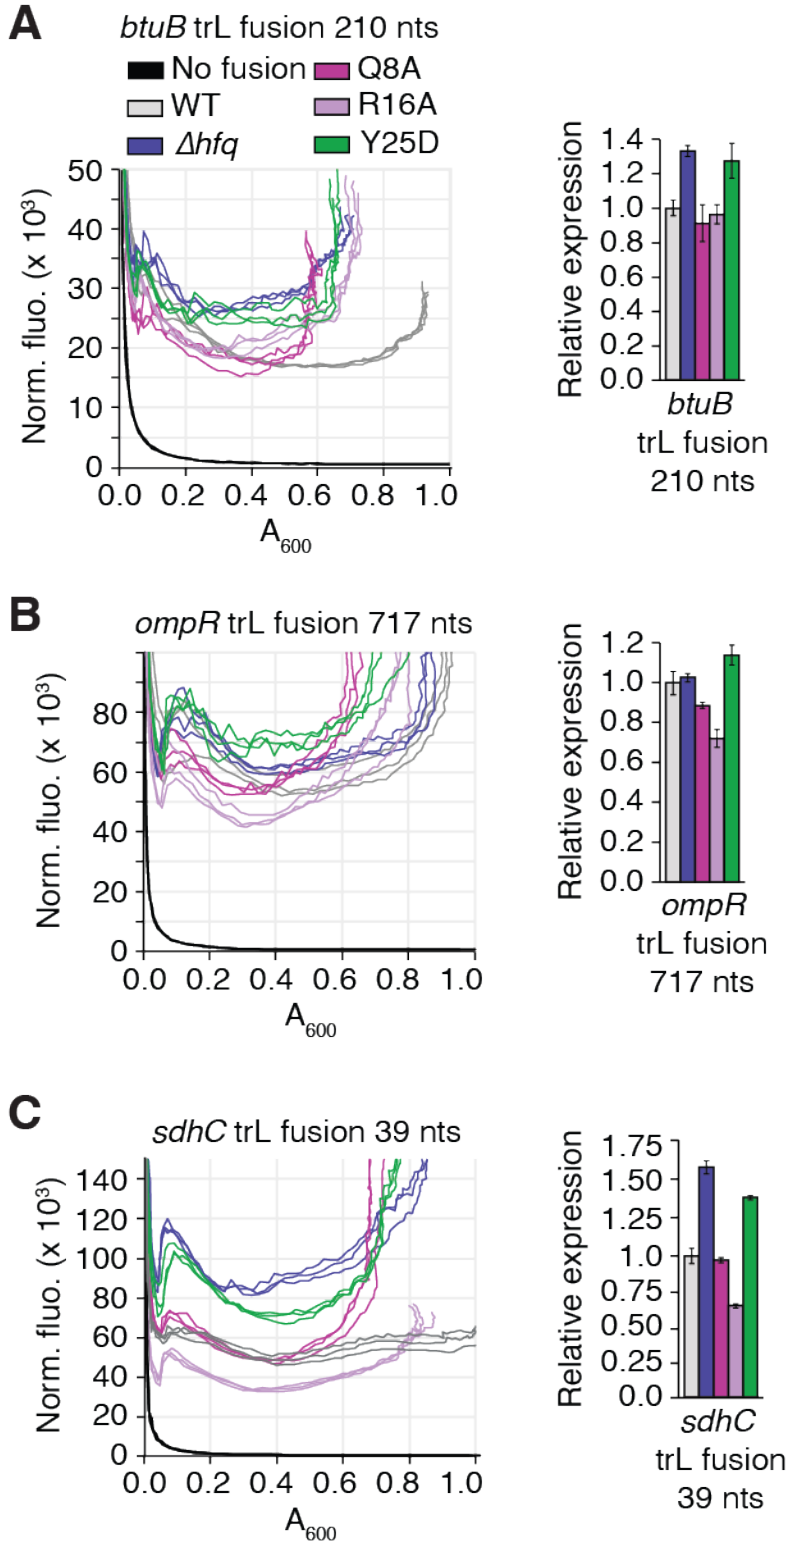

**Supplementary Figure S10. The fluorescence of *BtuB*<sub>210</sub>-mScarlet (A), *OmpR*<sub>717</sub>-mScarlet (B) and *SdhC*<sub>39</sub>-mScarlet (C) fusions was measured in different *hfq***

**backgrounds, in strains transformed with the pBRplac empty vector.** Data are from the datasets shown in Supplementary Figure S7 (*btuB*, **A**), S5 (*ompR*, **B**), and S6 (*sdhC*, **C**). The corresponding relative expression diagrams (right panels) were prepared as in Supplementary Figure S5.

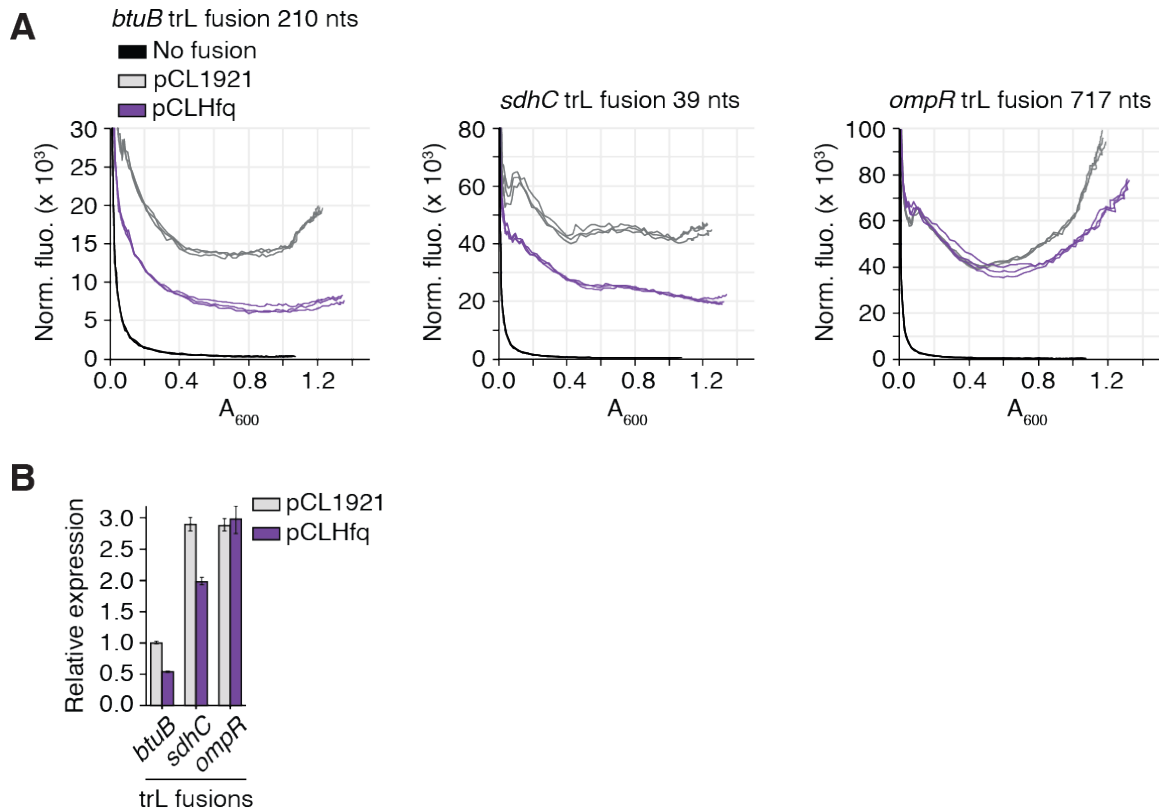

**Supplementary Figure S11. Hfq overproduction represses *btuB* and *sdhC* expression.**

(A) Graphic representation is as in Supplementary Figure S5. (B) The fluorescence of the BtuB<sub>210</sub>-, OmpR<sub>717</sub>- and SdhC<sub>39</sub>-mScarlet was measured in cells transformed with a plasmid overproducing Hfq (pCLHfq) or the corresponding empty vector (pCL1921) in triplicates.

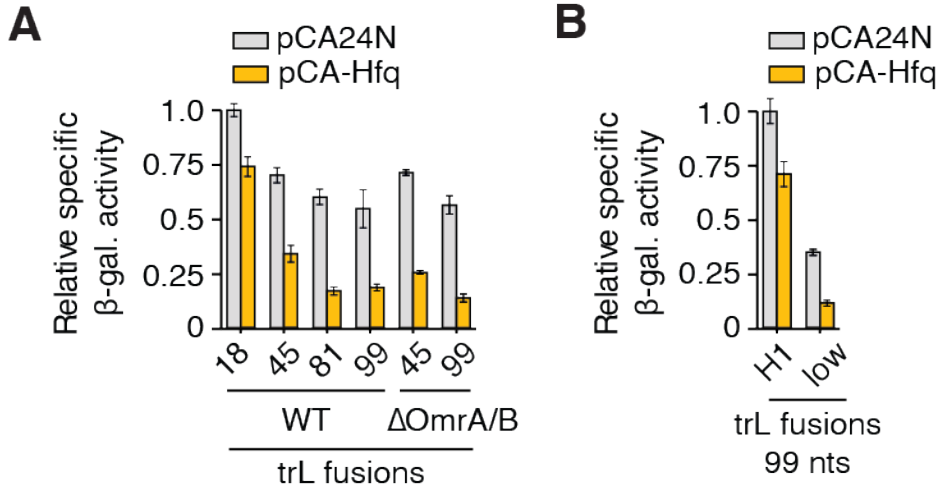

**Supplementary Figure S12. Repression of the BtuB-LacZ fusions upon the Hfq overexpression as a function of *btuB* ORF length.** (A)  $\beta$ -galactosidase assays of BtuB-LacZ translational fusions without or with overexpression of Hfq. The number of nucleotides of *btuB* ORF is indicated for each construct. The expression of the BtuB<sub>45</sub>- and BtuB<sub>99</sub>-LacZ fusions was measured in both *omrAB*<sup>+</sup> and *omrAB*<sup>-</sup> strains. (B)  $\beta$ -galactosidase assays of BtuB-LacZ translational fusions without or with overexpression of Hfq. Constructs either contain the H1 mutant or were expressed from a low expression promoter (low). For both panels, strains were grown in LB-Cam supplemented with 50  $\mu$ M IPTG.





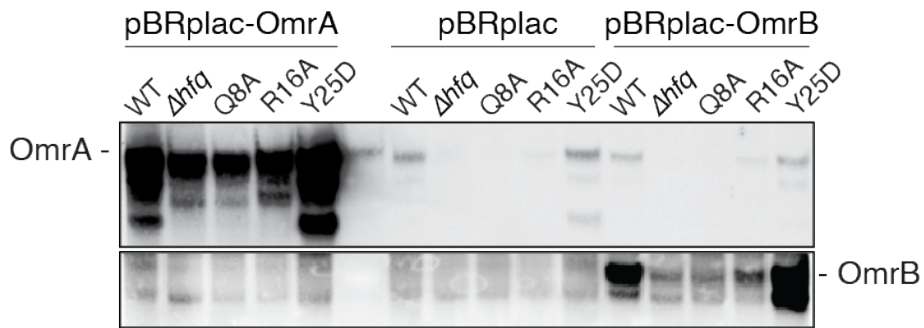

**Supplementary Figure S14. Northern blot analysis of levels of OmrA and OmrB.**

Shown are the same Northern blots as in Figure 5E, with a longer acquisition time, so that the chromosomally-expressed OmrA sRNA can now be detected.

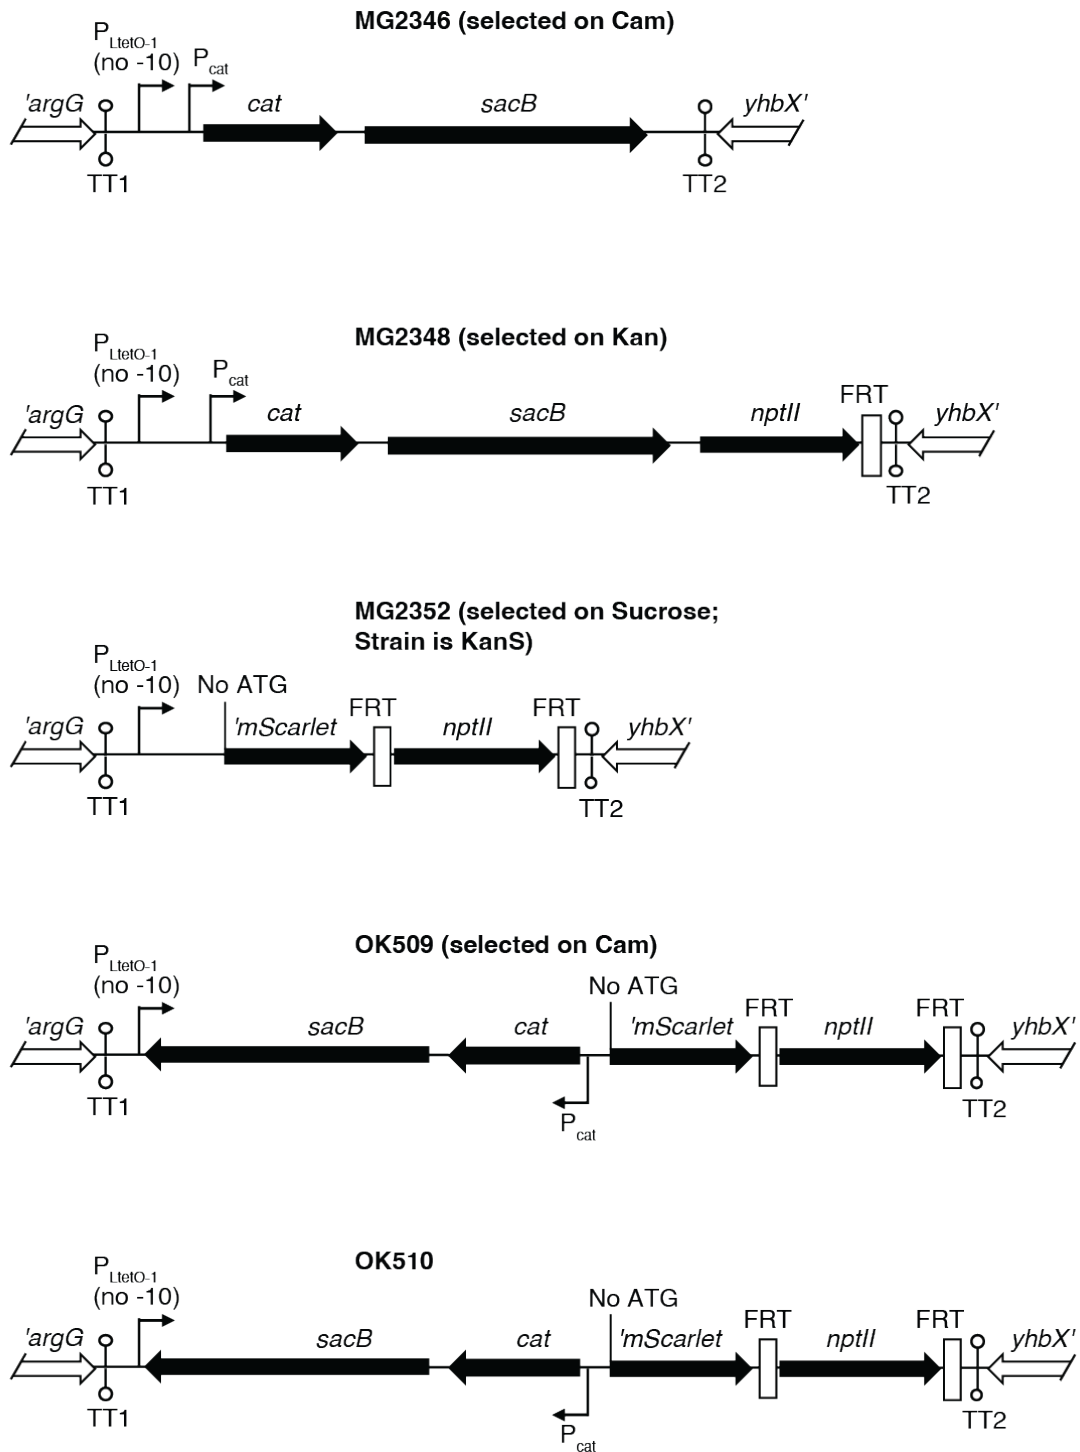

**Supplementary Figure S15. Schematics of the different steps leading to the OK510 strain used for the construction of mScarlet fusions by recombineering.** Shown is the genetic organization of the *argG*-*yhbX* intergenic region in the different intermediate strains. See supplementary text for details.



**Table S1. Strains and plasmids used in this study.**

| Strain name                                               | Characteristics                                                                                                                                       | References                                                                   |
|-----------------------------------------------------------|-------------------------------------------------------------------------------------------------------------------------------------------------------|------------------------------------------------------------------------------|
| MG1655                                                    | <i>E. coli</i> reference strain for this study                                                                                                        | From F. Blattner's lab                                                       |
| DJ480                                                     | MG1655 $\Delta lacX74$                                                                                                                                | D. Jin, NIH                                                                  |
| DJ624                                                     | MG1655 $\Delta lacX74$ , <i>mal::lacI<sup>q</sup></i>                                                                                                 | D. Jin, NIH, used as 'no fusion' control strain in Fig. 5                    |
| EM1055                                                    | MG1655 $\Delta lacX74$                                                                                                                                | (19) Same genotype as DJ480, used in Fig. 1                                  |
| EM1264                                                    | MG1055 <i>hfq::cat</i>                                                                                                                                | (20) Used in Fig. 1                                                          |
| EM1377                                                    | EM1055 <i>rne131 zce-726::Tn10</i>                                                                                                                    | (20) Used in Fig. 1                                                          |
| PM1205                                                    | MG1655 <i>mal::lacI<sup>q</sup> <math>\Delta araBAD araC+</math> mini-<math>\lambda</math>-Tet <i>lacI'::P<sub>BAD</sub>-cat-sacB-lacZ</i></i>        | (8)                                                                          |
| BTU1                                                      | PM1205 <i>lacI'::P<sub>BAD</sub>-BtuB<sub>-240+18</sub>-LacZ<sub>+28</sub></i>                                                                        | (21) Used in Fig. 2 and S3                                                   |
| BTU8                                                      | PM1205 <i>lacI'::P<sub>BAD</sub>-BtuB<sub>-240+63</sub>-LacZ<sub>+28</sub></i>                                                                        | This study, recombineering in PM1205, used in Fig. 2 and S3                  |
| BTU7                                                      | PM1205 <i>lacI'::P<sub>BAD</sub>-BtuB<sub>-240+81</sub>-LacZ<sub>+28</sub></i>                                                                        | This study, recombineering in PM1205, used in Fig. 2 and S3                  |
| BTU20                                                     | PM1205 <i>lacI'::P<sub>BAD</sub>-BtuB<sub>-240+81</sub>EP1-LacZ<sub>+28</sub></i>                                                                     | This study, recombineering in PM1205, used in Fig. 2                         |
| BTU21                                                     | PM1205 <i>lacI'::P<sub>BAD</sub>-BtuB<sub>-240+81</sub>EP2-LacZ<sub>+28</sub></i>                                                                     | This study, recombineering in PM1205, used in Fig. 2                         |
| BTU22                                                     | PM1205 <i>lacI'::P<sub>BAD</sub>-BtuB<sub>-240+81</sub>EP3-LacZ<sub>+28</sub></i>                                                                     | This study, recombineering in PM1205, used in Fig. 2                         |
| BTU6                                                      | PM1205 <i>lacI'::P<sub>BAD</sub>-BtuB<sub>-240+120</sub>-LacZ<sub>+28</sub></i>                                                                       | This study, recombineering in PM1205, used in Fig. 2 and S3                  |
| BTU5                                                      | PM1205 <i>lacI'::P<sub>BAD</sub>-BtuB<sub>-240+210</sub>-LacZ<sub>+28</sub></i>                                                                       | This study, recombineering in PM1205, used in Fig. 2 and S3                  |
| BTU4                                                      | PM1205 <i>lacI'::P<sub>BAD</sub>-BtuB<sub>-240+420</sub>-LacZ<sub>+28</sub></i>                                                                       | This study, recombineering in PM1205, used in Fig. 2 and S3                  |
| BTU2                                                      | PM1205 <i>lacI'::P<sub>BAD</sub>-btuB<sub>-240+18</sub>-lacZ<sub>-38</sub></i>                                                                        | (19) Used in Fig. 2 and S3                                                   |
| BTU13                                                     | PM1205 <i>lacI'::P<sub>BAD</sub>-btuB<sub>-240+81</sub>-lacZ<sub>-38</sub></i>                                                                        | This study, recombineering in PM1205, used in Fig. 2, 3A and 3B, and S3      |
| BTU14                                                     | PM1205 <i>lacI'::P<sub>BAD</sub>-btuB<sub>-240+45</sub>-lacZ<sub>-38</sub></i>                                                                        | This study, recombineering in PM1205, used in Fig. 2 and S3                  |
| BTU11                                                     | PM1205 <i>lacI'::P<sub>BAD</sub>-btuB<sub>-240+210</sub>-lacZ<sub>-38</sub></i>                                                                       | This study, recombineering in PM1205, used in Fig. 2, 3A and 3B, and S3      |
| BTU10                                                     | PM1205 <i>lacI'::P<sub>BAD</sub>-btuB<sub>-240+420</sub>-lacZ<sub>-38</sub></i>                                                                       | This study, recombineering in PM1205, used in Fig. 2 and S3                  |
| DJS2604                                                   | MG1655 <i><math>\Delta hfq::cat-sacB</math>, purA::FRT-nptII-FRT</i>                                                                                  | D. Schu, unpublished                                                         |
| DJS2609                                                   | MG1655 <i>hfq WT</i>                                                                                                                                  | D. Schu, unpublished                                                         |
| DJS2927                                                   | MG1655 <i><math>\Delta hfq</math></i>                                                                                                                 | D. Schu, unpublished                                                         |
| HfrG6 $\Delta lac12$ RevES191 <i>rne131 zce-726::Tn10</i> | An <i>rne131</i> donor strain                                                                                                                         | M. Dreyfus, provided by Eliane Hajnsdorf                                     |
| JJ0015                                                    | MG1508 <i>mhpR-P<sub>LtetO-1</sub>-FepA<sub>-173+45</sub>-LacZ<sub>+28</sub> <math>\Delta mini-\lambda</math>-Tet <math>\Delta omrAB::nptI</math></i> | (22) Used in Fig. 4E and S6A                                                 |
| JJ360                                                     | MG1508 <i>mhpR-P<sub>LtetO-1</sub>-BtuB<sub>-240+45</sub>-LacZ<sub>+28</sub> <math>\Delta mini-\lambda</math>-Tet</i>                                 | This study; recombineering in MG1508                                         |
| JJ389                                                     | MG1508 <i>mhpR-P<sub>LtetO-1</sub>-FepA<sub>-146+45</sub>-LacZ<sub>+28</sub> <math>\Delta mini-\lambda</math>-Tet</i>                                 | Lab collection (strain from J. Jagodnik), used in Fig. S5C                   |
| JJ415                                                     | MG1508 <i>mhpR-P<sub>LtetO-1</sub>-BtuB<sub>-240+81</sub>-LacZ<sub>+28</sub> <math>\Delta mini-\lambda</math>-Tet</i>                                 | This study; recombineering in MG1508                                         |
| JJ416                                                     | MG1508 <i>mhpR-P<sub>LtetO-1</sub>-BtuB<sub>-240+99</sub>-LacZ<sub>+28</sub> <math>\Delta mini-\lambda</math>-Tet</i>                                 | This study; recombineering in MG1508, used in Fig. 4F-G, 6B, and S4A and S4D |
| JJ425                                                     | MG1508 <i>mhpR-P<sub>LtetO-1</sub>-BtuBM9<sub>-240+99</sub>-LacZ<sub>+28</sub> <math>\Delta mini-\lambda</math>-Tet</i>                               | This study; recombineering in MG1508, used in Fig. 4G and S4D                |

|        |                                                                                                                               |                                                                             |
|--------|-------------------------------------------------------------------------------------------------------------------------------|-----------------------------------------------------------------------------|
| JJ426  | JJ416 <i>ΔomrAB::nptI</i>                                                                                                     | This study; JJ416 + P1 (MG1003), used in Fig. 4B-G, S6A, S6C and S6D        |
| JJ427  | JJ425 <i>ΔomrAB::nptI</i>                                                                                                     | This study; JJ425 + P1 (MG1003), used in Fig. 4B, 4G and S6A                |
| JW0334 | BW25113 <i>ΔlacY::FRT-nptII-FRT</i>                                                                                           | Keio collection (11)                                                        |
| JW1087 | BW25113 <i>ΔptsG::FRT-nptII-FRT</i>                                                                                           | Keio collection (11)                                                        |
| JW3140 | BW25113 <i>ΔargG::FRT-nptII-FRT</i>                                                                                           | Keio collection (11)                                                        |
| JW5851 | BW25113 <i>Δpnp::FRT-nptII-FRT</i>                                                                                            | Keio collection (11)                                                        |
| KK2560 | MG1655 <i>hfqQ8A</i>                                                                                                          | D. Schu, unpublished                                                        |
| KK2561 | MG1655 <i>hfqR16A</i>                                                                                                         | D. Schu, unpublished                                                        |
| KK2562 | MG1655 <i>hfqY25D</i>                                                                                                         | D. Schu, unpublished                                                        |
| MG1001 | DJ480 <i>ΔomrA::nptI Δmini-λ-Tet</i>                                                                                          | This study; recombineering in NM300                                         |
| MG1002 | DJ480 <i>ΔomrB::nptI Δmini-λ-Tet</i>                                                                                          | This study; recombineering in NM300                                         |
| MG1003 | DJ480 <i>ΔomrAB::nptI Δmini-λ-Tet</i>                                                                                         | (10)                                                                        |
| MG1099 | DJ624 <i>ΔomrAB::nptI</i>                                                                                                     | (10)                                                                        |
| MG1432 | DJ624 <i>mini-λ-Tet</i>                                                                                                       | M. Guillier, unpublished.                                                   |
| MG1508 | MG1655 <i>mal::lacI<sup>q</sup>, mini-λ-Tet, mhpR-P<sub>Ltet0-1</sub>-cat-sacB-lacZ</i>                                       | (9)                                                                         |
| MG1582 | MG1508 <i>mhpR-P<sub>Ltet0-1</sub>-cirA<sub>-160+30</sub>-lacZ<sub>+28</sub> Δmini-λ-Tet</i>                                  | This study; recombineering in MG1508                                        |
| MG2288 | MG1582 <i>ΔomrAB::nptI</i>                                                                                                    | This study; MG1582 + P1 (MG1003), used in Fig. 4E and S6A                   |
| MG2346 | MG1432 <i>argG-[TT1-P<sub>Ltet0-1</sub>(no -10)-cat-sacB-TT2]-yhbX</i>                                                        | This study                                                                  |
| MG2348 | MG2346 <i>argG-[TT1-P<sub>Ltet0-1</sub>(no -10)-cat-sacB-nptII-FRT-TT2]-yhbX</i>                                              | This study                                                                  |
| MG2352 | MG2348 <i>argG-[TT1-P<sub>Ltet0-1</sub>(no -10)-'mScarlet(no ATG)-FRT-nptII-FRT-TT2]-yhbX</i>                                 | This study                                                                  |
| MG2389 | OK819 <i>ΔomrAB::nptI</i>                                                                                                     | This study; OK819 + P1 (MG1003), used in Fig. 4C                            |
| NM300  | DJ480 <i>mini-λ-Tet</i>                                                                                                       | N. Majdalani, NIH                                                           |
| OK509  | MG2352 <i>argG-[TT1-P<sub>Ltet0-1</sub>(no -10)-sacB-cat-'mScarlet(no ATG)-FRT-nptII-FRT-TT2]-yhbX</i>                        | This study; recombineering; <i>cat-sacB</i> cassette recombined into MG2352 |
| OK510  | MG1432 <i>argG-[TT1-P<sub>Ltet0-1</sub>(no -10)-sacB-cat-'mScarlet(no ATG)-FRT-nptII-FRT-TT2]-yhbX</i>                        | This study; MG1432 + P1 (OK509)                                             |
| OK523  | DJ624 <i>ΔargG::FRT-nptII-FRT</i>                                                                                             | This study; DJ624 + P1 (JW3140)                                             |
| OK528  | OK510 <i>argG-[TT1-P<sub>Ltet0-1</sub>-SdhC<sub>-222+39</sub>-mScarlet<sub>+4</sub>-FRT-nptII-FRT-TT2]-yhbX, Δmini-λ-Tet</i>  | This study; recombineering in OK510                                         |
| OK529  | OK510 <i>argG-[TT1-P<sub>Ltet0-1</sub>-OmpR<sub>-35+717</sub>-mScarlet<sub>+4</sub>-FRT-nptII-FRT-TT2]-yhbX, Δmini-λ-Tet</i>  | This study; recombineering in OK510                                         |
| OK530  | OK523 <i>ΔargG::FRT</i>                                                                                                       | This study; elimination of <i>nptII</i> in OK523 via Flp-FRT recombination  |
| OK560  | OK528 <i>argG-[TT1-P<sub>Ltet0-1</sub>-SdhC<sub>-222+39</sub>-mScarlet<sub>+4</sub>-FRT-TT2]-yhbX</i>                         | This study; elimination of <i>nptII</i> in OK528 via Flp-FRT recombination  |
| OK561  | OK529 <i>argG-[TT1-P<sub>Ltet0-1</sub>-OmpR<sub>-35+717</sub>-mScarlet<sub>+4</sub>-FRT-TT2]-yhbX</i>                         | This study; elimination of <i>nptII</i> in OK529 via Flp-FRT recombination  |
| OK564  | OK530 <i>Δhfq::cat-sacB, purA::FRT-nptII-FRT</i>                                                                              | This study; OK530 + P1 (DJS2604)                                            |
| OK572  | OK510 <i>argG-[TT1-P<sub>Ltet0-1</sub>-BtuB<sub>-240+210</sub>-mScarlet<sub>+4</sub>-FRT-nptII-FRT-TT2]-yhbX, Δmini-λ-Tet</i> | This study; recombineering in OK510                                         |
| OK577  | OK572 <i>argG-[TT1-P<sub>Ltet0-1</sub>-BtuB<sub>-240+210</sub>-mScarlet<sub>+4</sub>-FRT-TT2]-yhbX</i>                        | This study; elimination of <i>nptII</i> in OK572 via Flp-FRT recombination  |
| OK581  | OK564 <i>hfq WT</i>                                                                                                           | This study; OK564 + P1 (DJS2609) (purine prototroph selection)              |
| OK582  | OK564 <i>Δhfq</i>                                                                                                             | This study; OK564 + P1 (DJS2927) (purine prototroph selection)              |
| OK583  | OK564 <i>hfqQ8A</i>                                                                                                           | This study; OK564 + P1 (KK2560) (purine prototroph selection)               |

|       |                                                                                                                       |                                                                                                                     |
|-------|-----------------------------------------------------------------------------------------------------------------------|---------------------------------------------------------------------------------------------------------------------|
| OK584 | OK564 <i>hfqR16A</i>                                                                                                  | This study; OK564 + P1 (KK2561) (purine prototroph selection)                                                       |
| OK585 | OK564 <i>hfqY25D</i>                                                                                                  | This study; OK564 + P1 (KK2562) (Selecting for SucrR)                                                               |
| OK586 | OK581 <i>argG</i> -[TT1-P <sub>LtetO-1</sub> -BtuB <sub>-240+210</sub> -mScarlet <sub>+4</sub> -FRT-TT2]- <i>yhbX</i> | This study; OK581 + P1 (OK577) (arginine prototroph selection), used in Fig. 5A,B,E, and S5A,B,D,F, S7, S10 and S11 |
| OK587 | OK582 <i>argG</i> -[TT1-P <sub>LtetO-1</sub> -BtuB <sub>-240+210</sub> -mScarlet <sub>+4</sub> -FRT-TT2]- <i>yhbX</i> | This study; OK582 + P1 (OK577) (arginine prototroph selection), used in Fig. 5B and 5E, and S7 and S10              |
| OK588 | OK583 <i>argG</i> -[TT1-P <sub>LtetO-1</sub> -BtuB <sub>-240+210</sub> -mScarlet <sub>+4</sub> -FRT-TT2]- <i>yhbX</i> | This study; OK583 + P1 (OK577) (arginine prototroph selection), used in Fig. 5B and 5E, and S7 and S10              |
| OK589 | OK584 <i>argG</i> -[TT1-P <sub>LtetO-1</sub> -BtuB <sub>-240+210</sub> -mScarlet <sub>+4</sub> -FRT-TT2]- <i>yhbX</i> | This study; OK584 + P1 (OK577) (arginine prototroph selection), used in Fig. 5B and 5E, and S7 and S10              |
| OK590 | OK585 <i>argG</i> -[TT1-P <sub>LtetO-1</sub> -BtuB <sub>-240+210</sub> -mScarlet <sub>+4</sub> -FRT-TT2]- <i>yhbX</i> | This study; OK585 + P1 (OK577) (arginine prototroph selection), used in Fig. 5B and 5E, and S7 and S10              |
| OK596 | OK581 <i>argG</i> -[TT1-P <sub>LtetO-1</sub> -SdhC <sub>-222+39</sub> -mScarlet <sub>+4</sub> -FRT-TT2]- <i>yhbX</i>  | This study; OK581 + P1 (OK560) (arginine prototroph selection), used in Fig. 5D and 5F, and S9, S10 and S11         |
| OK597 | OK582 <i>argG</i> -[TT1-P <sub>LtetO-1</sub> -SdhC <sub>-222+39</sub> -mScarlet <sub>+4</sub> -FRT-TT2]- <i>yhbX</i>  | This study; OK582 + P1 (OK560) (arginine prototroph selection), used in Fig. 5D and 5F, and S9 and S10              |
| OK598 | OK583 <i>argG</i> -[TT1-P <sub>LtetO-1</sub> -SdhC <sub>-222+39</sub> -mScarlet <sub>+4</sub> -FRT-TT2]- <i>yhbX</i>  | This study; OK583 + P1 (OK560) (arginine prototroph selection), used in Fig. 5D and 5F, and S9 and S10              |
| OK599 | OK584 <i>argG</i> -[TT1-P <sub>LtetO-1</sub> -SdhC <sub>-222+39</sub> -mScarlet <sub>+4</sub> -FRT-TT2]- <i>yhbX</i>  | This study; OK584 + P1 (OK560) (arginine prototroph selection), used in Fig. 5D and 5F, and S9 and S10              |
| OK600 | OK585 <i>argG</i> -[TT1-P <sub>LtetO-1</sub> -SdhC <sub>-222+39</sub> -mScarlet <sub>+4</sub> -FRT-TT2]- <i>yhbX</i>  | This study; OK585 + P1 (OK560) (arginine prototroph selection), used in Fig. 5D and 5F, and S9 and S10              |
| OK601 | OK581 <i>argG</i> -[TT1-P <sub>LtetO-1</sub> -OmpR <sub>-35+717</sub> -mScarlet <sub>+4</sub> -FRT-TT2]- <i>yhbX</i>  | This study; OK581 + P1 (OK561) (arginine prototroph selection), used in Fig. 5C, and S8, S10 and S11                |
| OK602 | OK582 <i>argG</i> -[TT1-P <sub>LtetO-1</sub> -OmpR <sub>-35+717</sub> -mScarlet <sub>+4</sub> -FRT-TT2]- <i>yhbX</i>  | This study; OK582 + P1 (OK561) (arginine prototroph selection), used in Fig. 5C, and S8 and S10                     |
| OK603 | OK583 <i>argG</i> -[TT1-P <sub>LtetO-1</sub> -OmpR <sub>-35+717</sub> -mScarlet <sub>+4</sub> -FRT-TT2]- <i>yhbX</i>  | This study; OK583 + P1 (OK561) (arginine prototroph selection), used in Fig. 5C, and S8 and S10                     |
| OK604 | OK584 <i>argG</i> -[TT1-P <sub>LtetO-1</sub> -OmpR <sub>-35+717</sub> -mScarlet <sub>+4</sub> -FRT-TT2]- <i>yhbX</i>  | This study; OK584 + P1 (OK561) (arginine prototroph selection), used in Fig. 5C, and S8 and S10                     |
| OK605 | OK585 <i>argG</i> -[TT1-P <sub>LtetO-1</sub> -OmpR <sub>-35+717</sub> -mScarlet <sub>+4</sub> -FRT-TT2]- <i>yhbX</i>  | This study; OK585 + P1 (OK561) (arginine prototroph selection), used in Fig. 5C, and S8 and S10                     |
| OK615 | JJ416 <i>ΔomrA::nptI</i>                                                                                              | This study; JJ416 + P1 (MG1001), used in Fig. 4F-G                                                                  |
| OK616 | JJ416 <i>ΔomrB::nptI</i>                                                                                              | This study; JJ416 + P1 (MG1002), used in Fig. 4F-G                                                                  |
| OK617 | JJ425 <i>ΔomrA::nptI</i>                                                                                              | This study; JJ425 + P1 (MG1001), used in Fig. 4G                                                                    |
| OK618 | JJ425 <i>ΔomrB::nptI</i>                                                                                              | This study; JJ425 + P1 (MG1002), used in Fig. 4G                                                                    |
| OK627 | OK586 <i>Δpnp::FRT-nptII-FRT</i>                                                                                      | This study, OK586 + P1 (JW5851), used in Fig. S5A,B,E,F                                                             |
| OK632 | MG1508 <i>mhpR</i> -P <sub>LtetO-1</sub> -BtuB <sub>-240+99</sub> <i>mutH1-lacZ</i> <sub>+28</sub> <i>Δmini-λ-Tet</i> | This study; recombineering in MG1508, used in Fig. 6B                                                               |

|       |                                                                                                                               |                                                                                                |
|-------|-------------------------------------------------------------------------------------------------------------------------------|------------------------------------------------------------------------------------------------|
| OK737 | MG1508 <i>mhpR</i> -lowP <sub>LtetO-1</sub> - <i>BtuB</i> <sub>-240+99</sub> - <i>lacZ</i> <sub>+28</sub> <i>Δmini-λ-Tet</i>  | This study; recombineering in MG1508, used in Fig. 6B                                          |
| OK750 | MG1508 <i>mhpR</i> -P <sub>LtetO-1</sub> - <i>btuB</i> <sub>-240+210</sub> - <i>lacZ</i> <sub>-38</sub> <i>Δmini-λ-Tet</i>    | This study; recombineering in MG1508, used in Fig. 3C                                          |
| OK751 | MG1508 <i>mhpR</i> -P <sub>LtetO-1</sub> - <i>btuB</i> <sub>-240+420</sub> - <i>lacZ</i> <sub>-38</sub> <i>Δmini-λ-Tet</i>    | This study; recombineering in MG1508, used in Fig. 3C                                          |
| OK756 | DJ624 <i>rhoR66S</i>                                                                                                          | (23)                                                                                           |
| OK762 | OK756 <i>mhpR</i> -P <sub>LtetO-1</sub> - <i>btuB</i> <sub>-240+210</sub> - <i>lacZ</i> <sub>-38</sub>                        | This study; OK756 + P1(OK750), used in Fig. 3C                                                 |
| OK763 | OK756 <i>mhpR</i> -P <sub>LtetO-1</sub> - <i>btuB</i> <sub>-240+420</sub> - <i>lacZ</i> <sub>-38</sub>                        | This study; OK756 + P1(OK751), used in Fig. 3C                                                 |
| OK764 | MG1508 <i>mhpR</i> -P <sub>LtetO-1</sub> - <i>btuB</i> <sub>-240+81</sub> - <i>lacZ</i> <sub>-38</sub> <i>Δmini-λ-Tet</i>     | This study; recombineering in MG1508, used in Fig. 3C                                          |
| OK819 | MG1508 <i>mhpR</i> -P <sub>LtetO-1</sub> - <i>btuBM11</i> <sub>-240+99</sub> - <i>lacZ</i> <sub>+28</sub> <i>Δmini-λ-Tet</i>  | This study; recombineering in MG1508                                                           |
| OK833 | MG1508 <i>mhpR</i> -P <sub>LtetO-1</sub> - <i>BtuB</i> <sub>-240+99</sub> EP1- <i>lacZ</i> <sub>+28</sub> <i>Δmini-λ-Tet</i>  | This study; recombineering in MG1508, used in Fig. S4A                                         |
| OK835 | MG1508 <i>mhpR</i> -P <sub>LtetO-1</sub> - <i>BtuB</i> <sub>-240+99</sub> EP3- <i>lacZ</i> <sub>+28</sub> <i>Δmini-λ-Tet</i>  | This study; recombineering in MG1508, used in Fig. S4A                                         |
| OK836 | MG1508 <i>mhpR</i> -P <sub>LtetO-1</sub> - <i>BtuB</i> <sub>-240+18</sub> - <i>lacZ</i> <sub>+28</sub> <i>Δmini-λ-Tet</i>     | This study; recombineering in MG1508                                                           |
| OK837 | DJ624 <i>zce-726::Tn10 rne131</i>                                                                                             | This study; DJ624 + P1 (HfrG6Δ <i>lac12</i> RevES191 <i>rne131 zce-726::Tn10</i> )             |
| OK838 | DJ624 <i>ΔptsG::FRT-nptII-FRT rne131</i>                                                                                      | This study; OK837 + P1(JW1087)                                                                 |
| OK843 | OK756 <i>mhpR</i> -P <sub>LtetO-1</sub> - <i>btuB</i> <sub>-240+81</sub> - <i>lacZ</i> <sub>-38</sub>                         | This study; OK756 + P1(OK764), used in Fig. 3C                                                 |
| OK852 | MG1508 <i>mhpR</i> -P <sub>LtetO-1</sub> - <i>btuB</i> <sub>-240+210</sub> EP1- <i>lacZ</i> <sub>-38</sub> <i>Δmini-λ-Tet</i> | This study; recombineering in MG1508, used in Fig. S4B                                         |
| OK854 | MG1508 <i>mhpR</i> -P <sub>LtetO-1</sub> - <i>btuB</i> <sub>-240+210</sub> EP3- <i>lacZ</i> <sub>-38</sub> <i>Δmini-λ-Tet</i> | This study; recombineering in MG1508, used in Fig. S4B                                         |
| OK855 | OK764 <i>ΔptsG::FRT-nptII-FRT rne131</i>                                                                                      | This study; OK764 + P1(OK838), <i>rne131</i> allele checked by PCR, used in Fig. S4C           |
| OK856 | OK764 <i>ΔptsG::FRT-nptII-FRT</i>                                                                                             | This study; OK764 + P1(OK838), <i>rne</i> <sup>*</sup> allele checked by PCR, used in Fig. S4C |
| OK857 | OK750 <i>ΔptsG::FRT-nptII-FRT rne131</i>                                                                                      | This study; OK750 + P1(OK838), <i>rne131</i> allele checked by PCR, used in Fig. S4C           |
| OK858 | OK750 <i>ΔptsG::FRT-nptII-FRT</i>                                                                                             | This study; OK750 + P1(OK838), <i>rne</i> <sup>*</sup> allele checked by PCR, used in Fig. S4C |
| OK859 | OK751 <i>ΔptsG::FRT-nptII-FRT rne131</i>                                                                                      | This study; OK751 + P1(OK838), <i>rne131</i> allele checked by PCR, used in Fig. S4C           |
| OK860 | OK751 <i>ΔptsG::FRT-nptII-FRT</i>                                                                                             | This study; OK751 + P1(OK838), <i>rne</i> <sup>*</sup> allele checked by PCR, used in Fig. S4C |
| OK865 | MG1508 <i>ΔlacY::FRT-nptII-FRT Δmini-λ-Tet</i>                                                                                | This study; recombineering in MG1508 (selecting for KanR)                                      |
| OK866 | OK865 <i>ΔlacY::FRT</i>                                                                                                       | This study; elimination of <i>nptII</i> in OK865 via Flp-FRT recombination                     |
| OK868 | DJ624 <i>mini-λ-Tet, mhpR</i> -P <sub>LtetO-1</sub> - <i>cat-sacB-lacZ ΔlacY::FRT</i>                                         | This study; MG1432 + P1 (OK866)                                                                |
| OK870 | OK868 <i>mhpR</i> -P <sub>LtetO-1</sub> - <i>BtuB</i> <sub>-240+18</sub> - <i>lacZ</i> <sub>+28</sub> <i>Δmini-λ-Tet</i>      | This study; recombineering in OK868, used in Fig. S12A.                                        |
| OK871 | OK868 <i>mhpR</i> -P <sub>LtetO-1</sub> - <i>BtuB</i> <sub>-240+45</sub> - <i>lacZ</i> <sub>+28</sub> <i>Δmini-λ-Tet</i>      | This study; recombineering in OK868, used in Fig. S12A.                                        |
| OK872 | OK868 <i>mhpR</i> -P <sub>LtetO-1</sub> - <i>BtuB</i> <sub>-240+81</sub> - <i>lacZ</i> <sub>+28</sub> <i>Δmini-λ-Tet</i>      | This study; recombineering in OK868, used in Fig. S12A.                                        |

| OK873               | OK868 <i>mhpR</i> -P <sub>LtetO-1</sub> -BtuB-240+99-lacZ <sub>28</sub> $\Delta$ <i>mini-<math>\lambda</math>-Tet</i>                                                                                                                          | This study; recombineering in OK868, used in Fig. S12A. |
|---------------------|------------------------------------------------------------------------------------------------------------------------------------------------------------------------------------------------------------------------------------------------|---------------------------------------------------------|
| OK874               | OK868 <i>mhpR</i> -P <sub>LtetO-1</sub> -BtuB-240+99muth1-lacZ <sub>28</sub> $\Delta$ <i>mini-<math>\lambda</math>-Tet</i>                                                                                                                     | This study; recombineering in OK868, used in Fig. S12B. |
| OK875               | OK868 <i>mhpR</i> -lowP <sub>LtetO-1</sub> -BtuB-240+99-lacZ <sub>28</sub> $\Delta$ <i>mini-<math>\lambda</math>-Tet</i>                                                                                                                       | This study; recombineering in OK868, used in Fig. S12B. |
| OK886               | OK871 $\Delta$ <i>omrAB::nptI</i>                                                                                                                                                                                                              | This study; OK871 + P1 (MG1099), used in Fig. S12A.     |
| OK887               | OK873 $\Delta$ <i>omrAB::nptI</i>                                                                                                                                                                                                              | This study; OK873 + P1 (MG1099), used in Fig. S12A.     |
|                     |                                                                                                                                                                                                                                                |                                                         |
| Plasmid             | Characteristics                                                                                                                                                                                                                                | Use                                                     |
| pNM12               | Amp <sup>R</sup> , pBAD24 derivative                                                                                                                                                                                                           | (24) pBAD vector control                                |
| pBAD-OmrA           | <i>omrA</i> under P <sub>BAD</sub> control in pNM12                                                                                                                                                                                            | (10) OmrA overproduction                                |
| pBAD-OmrB           | <i>omrB</i> under P <sub>BAD</sub> control in pNM12                                                                                                                                                                                            | (10) OmrB overproduction                                |
| pCP20               | FLP <sup>+</sup> , $\lambda$ cI857 <sup>+</sup> , $\lambda$ p <sub>R</sub> Rep <sup>TS</sup> , Amp <sup>R</sup> , Cam <sup>R</sup>                                                                                                             | (12) <i>nptII</i> elimination via Flp-FRT recombination |
| pBRplac             | Amp <sup>R</sup> , Tet <sup>R</sup> , P <sub>LlacO-1</sub> cloned into pBR322                                                                                                                                                                  | (10) vector control                                     |
| pOmrA               | <i>omrA</i> under P <sub>LlacO-1</sub> control in pBRplac                                                                                                                                                                                      | (10) OmrA overproduction                                |
| pOmrAM5'            | <i>omrAM5'</i> under P <sub>LlacO-1</sub> control in pBRplac<br>M5' = change of nt 3-6 of OmrA from <u>CAGA</u> to <u>GAA</u> C (a.k.a. <i>omrAmut2</i> in (10))                                                                               | (10) OmrAM5' overproduction                             |
| pOmrAM9*            | <i>omrAM9*</i> under P <sub>LlacO-1</sub> control in pBRplac<br>M9 = change of nt 26-36 of OmrA from <u>AUUCGGUACGC</u> to <u>GCGAAAUACCG</u>                                                                                                  | This study; OmrAM9* overproduction                      |
| pOmrAM11*           | <i>omrAM11*</i> under P <sub>LlacO-1</sub> control in pBRplac<br>M9 = change of nt 20-22 of OmrA from <u>GAG</u> to <u>CUC</u>                                                                                                                 | This study; OmrAM11* overproduction                     |
| pOmrAopt            | <i>omrAopt</i> under P <sub>LlacO-1</sub> control in pBRplac<br>opt = change of nt 32-41 of OmrA from UACGCUCUUC to GCUG (a.k.a. <i>omrAmut8</i> in the lab stock)                                                                             | This study; OmrAopt overproduction                      |
| pOmrAoptM9*         | <i>omrAoptM9*</i> under P <sub>LlacO-1</sub> control in pBRplac<br>optM9* = change of nt 26-41 of OmrA from AUUCGGUACGCUCUUC to GCGAAACGUG (a.k.a. <i>omrAmut8+9</i> in the lab stock, it is the compensatory change to <i>btuBM9</i> variant) | This study; OmrAoptM9* overproduction                   |
| pOmrB               | <i>omrB</i> under P <sub>LlacO-1</sub> control in pBRplac                                                                                                                                                                                      | (10) OmrB overproduction                                |
| pSpot42             | <i>spf</i> under P <sub>LlacO-1</sub> control in pBRplac                                                                                                                                                                                       | (25) Spot 42 overproduction                             |
| pCL1921             | SpcR/StrR, pSC101 derivative                                                                                                                                                                                                                   | (26)                                                    |
| pCLhfq <sup>+</sup> | <i>E. coli hfq</i> under its natural promoter control in pCL1921                                                                                                                                                                               | (27)                                                    |
| pCA24N              | Cam <sup>R</sup> , P <sub>T5-lac</sub> , lacI <sup>q</sup> ,                                                                                                                                                                                   | (14), vector control used in Fig. S12                   |
| pCAS18              | <i>E. coli rpsR</i> gene under control of P <sub>T5-lac</sub> , in pCA24N                                                                                                                                                                      | M. Springer, unpublished                                |
| pCAS18n             | <i>NdeI</i> site introduced at the <i>rpsR</i> start codon in pCAS18                                                                                                                                                                           | This study; made by PCR mutagenesis                     |
| pHfq                | <i>E. coli hfq</i> under P <sub>T7</sub> control in pET11a-PL                                                                                                                                                                                  | (15)                                                    |
| pNK139              | <i>E. coli hfq</i> under P <sub>T5-lac</sub> control in pCAS18n                                                                                                                                                                                | This study; used in Fig. S12 (pCA-Hfq)                  |

FRT is the Flp recombinase target site.

*mini- $\lambda$ -Tet* is a  $\lambda$  prophage lacking replication and lytic functions. It provides Red functions required for recombination, and resistance to tetracycline (3).

*mScarlet* is a fluorescent reporter (28); the *mScarlet-I* gene was optimized for codon usage in *E. coli* (6).

*nptI* and *nptII* are kanamycin resistance ORFs originating from Tn903 and Tn5, respectively.

P<sub>LtetO-1</sub> and P<sub>LlacO-1</sub> are hybrid tetracycline and IPTG-inducible promoters, respectively (5).

**Table S2. Oligonucleotides used in this study.**

| Name                                                                        | Sequence                                                                             | Use                                                                                                                                                                                      |
|-----------------------------------------------------------------------------|--------------------------------------------------------------------------------------|------------------------------------------------------------------------------------------------------------------------------------------------------------------------------------------|
| <b>Strains construction: P<sub>BAD</sub>-driven <i>lacZ</i> fusions</b>     |                                                                                      |                                                                                                                                                                                          |
| LB18                                                                        | ACCTGACGCTTTTTATCGCAACTCTACTGTTTCTCCATGCCGGTC<br>CTGTGAGTTAATAG                      | Forward primer for construction of P <sub>BAD</sub> - <i>btuB-lacZ</i> transcriptional and translational fusions                                                                         |
| LB66                                                                        | TAACGCCAGGGTTTTCCAGTCACGACGTTGTAACGACCTGTGCC<br>CAAGCGGAAAATG                        | Reverse primer for BTU8 construction                                                                                                                                                     |
| LB67                                                                        | TAACGCCAGGGTTTTCCAGTCACGACGTTGTAACGACAGTATC<br>CGGGCTGGTATCC                         | Reverse primer for BTU7 construction                                                                                                                                                     |
| LB75                                                                        | TAACGCCAGGGTTTTCCAGTCACGACGTTGTAACGACGCTGGC<br>GGCTGTTCAAAC                          | Reverse primer for BTU6 construction                                                                                                                                                     |
| LB76                                                                        | TAACGCCAGGGTTTTCCAGTCACGACGTTGTAACGACCGGAAG<br>ACGGCGCAGCA                           | Reverse primer for BTU5 construction                                                                                                                                                     |
| LB77                                                                        | TAACGCCAGGGTTTTCCAGTCACGACGTTGTAACGACGGAACC<br>ATAACAGCGGAGC                         | Reverse primer for BTU4 construction                                                                                                                                                     |
| LB78                                                                        | GTGTGATAAAGAAAGTTAAAATGCCGGATCTGCCGTGACGGAACAC<br>GC                                 | Reverse primer for BTU14 construction                                                                                                                                                    |
| LB79                                                                        | GTGTGATAAAGAAAGTTAAAATGCCGGATCAGTATCCGGGCTGGTA<br>TCCTG                              | Reverse primer for BTU13 construction                                                                                                                                                    |
| LB80                                                                        | GTGTGATAAAGAAAGTTAAAATGCCGGATCCGGAAGACGGCGCAGC<br>A                                  | Reverse primer for BTU11 construction                                                                                                                                                    |
| LB81                                                                        | GTGTGATAAAGAAAGTTAAAATGCCGGATCCGGAACCATAAACAGCG<br>GAGC                              | Reverse primer for BTU10 construction                                                                                                                                                    |
| Stop 5'-3'                                                                  | TAACGCCAGGGTTTTCCAGTCACGACGTTGTAACGACCATAGC<br>TGTTTCTGTGTGATAAAGAAAGTTAAAATGCCGGATC | Reverse primer to include the stop codon sequence followed by <i>lacZ</i> translation initiation region and homology region within <i>lacZ</i> (construction of transcriptional fusions) |
| LB69                                                                        | GGTTCTCATCATGCCGTAATATTGATG                                                          | Forward primer for EP1 mutant fusion construction                                                                                                                                        |
| LB70                                                                        | CATCAATATTACGGCATGATGAGAACC                                                          | Reverse primer for EP1 mutant fusion construction                                                                                                                                        |
| LB71                                                                        | GATGAAACCTGCCGCATCCTTCTTCTATTG                                                       | Forward primer for EP2 mutant fusion construction                                                                                                                                        |
| LB72                                                                        | CAATAGAAGAAGGATGCGGGCAGGTTTCATC                                                      | Reverse primer for EP2 mutant fusion construction                                                                                                                                        |
| LB73                                                                        | CTTCTATTGTGGATCGAATACAATGATTAATAAAGCTTCGC                                            | Forward primer for EP3 mutant fusion construction                                                                                                                                        |
| LB74                                                                        | GCGAAGCTTTTTAATCATTGTATTCGATCCACAATAGAAG                                             | Reverse primer for EP3 mutant fusion construction                                                                                                                                        |
| <b>Strains construction: P<sub>Ltet0-1</sub>-driven <i>lacZ</i> fusions</b> |                                                                                      |                                                                                                                                                                                          |
| 5'Ptet-cirA                                                                 | GATAGAGATTGACATCCCTATCAGTGATAGAGATACTGAGCACAAT<br>CAAAAAAGGCTGACAAATCAG              | P <sub>Ltet0-1</sub> -CirA-160+30-LacZ <sub>+28</sub> construction                                                                                                                       |
| 3'cirA-lacZ                                                                 | TAACGCCAGGGTTTTCCAGTCACGACGTTGTAACGACGACCCG<br>TACGAAAGGGTTCAAC                      |                                                                                                                                                                                          |
| 5'PtetBtuB-240                                                              | CCCTATCAGTGATAGAGATACTGAGCAGCCGGTCTGTGAGTTAA<br>TAGGGAATCC                           | P <sub>Ltet0-1</sub> -BtuB-240+210-mScarlet <sub>+4</sub> (or P <sub>Ltet0-1</sub> -BtuB-240+99-LacZ <sub>+28</sub> ) construction                                                       |
| 3'btuB45lacZrev                                                             | CCCAGTCACGACGTTGTAACGACTGCCGTGACGGAACACGCCGTC<br>AGCAGCG                             | P <sub>Ltet0-1</sub> -BtuB-240+45-LacZ <sub>+28</sub> construction                                                                                                                       |
| 3'lacZ-btuB+81                                                              | CCCAGTCACGACGTTGTAACGACAGTATCCGGGCTGGTATCCTG<br>TGCCC                                | P <sub>Ltet0-1</sub> -BtuB-240+81-LacZ <sub>+28</sub> construction                                                                                                                       |
| 3'lacZ-btuB+99                                                              | CCCAGTCACGACGTTGTAACGACGTTAGCAGTAACGACGAGAGT<br>ATCCG                                | P <sub>Ltet0-1</sub> -BtuB-240+99-LacZ <sub>+28</sub> construction                                                                                                                       |
| btuBmut9rev                                                                 | CCCAGTCACGACGTTGTAACGACGTTAGCAGTAACGACGAGAGT<br>GCGAAACGTGGTATCCTGTGCCAAGCGG         | P <sub>Ltet0-1</sub> -BtuBM9-240+99-LacZ <sub>+28</sub> construction                                                                                                                     |
| AK51                                                                        | CATATGGGGATTGGTGGCGACGAC                                                             | Amplification of <i>lacY</i> locus, Forward                                                                                                                                              |
| AK52                                                                        | CGGTAAGCCTTCGCACATATCGG                                                              | Amplification of <i>lacY</i> locus, Reverse                                                                                                                                              |
| AK462                                                                       | GTGGATGCTTTACAATGACCACCACCGCTTCGCTGC                                                 | P <sub>Ltet0-1</sub> -BtuB-240+99mutH1-LacZ <sub>+28</sub> construction                                                                                                                  |
| AK675                                                                       | GCCCCGATACTGAGGTCGTTACTGC                                                            | P <sub>Ltet0-1</sub> -BtuBM11-240+99-LacZ <sub>+28</sub> construction                                                                                                                    |
| AK701                                                                       | GGTTCTCATCATGCCGTAATATTGATG                                                          | <i>btuB</i> EP1 construction, forward                                                                                                                                                    |
| AK703                                                                       | CCTTCTTCTATTGTGGATCGAATACAATGATTAATAAAGC                                             | <i>btuB</i> EP3 construction, forward                                                                                                                                                    |

|                                                                                |                                                                                                    |                                                                                                                                                                                                               |
|--------------------------------------------------------------------------------|----------------------------------------------------------------------------------------------------|---------------------------------------------------------------------------------------------------------------------------------------------------------------------------------------------------------------|
| AK704                                                                          | CACGACGTTGTAACGACCGAAGCTTTTTTAAATCATTGTAAAGC                                                       | $P_{Ltet0-1}$ -BtuB-240+18-LacZ <sub>+28</sub> fusion construction                                                                                                                                            |
| AK283                                                                          | TGACACCATCGAATGGGCTCCCTATCAGTGATAGAGATGGACATCCTATC                                                 | low $P_{Ltet0-1}$ -BtuB-240+99-LacZ <sub>+28</sub> construction (amplification using JJ416 strain as template)                                                                                                |
| Ptet-55-12For                                                                  | CTCCCTATCAGTGATAGAGATTGACATCCCTATCAGTGATAGAG                                                       | Used to increase the length of the homology region with $P_{Ltet0-1}$ for recombineering if needed (used also for the construction of the mScarlet fusions)                                                   |
| lacZ28-66rev                                                                   | AAGCCAGGGTTTTCCAGTCAGCAGCTTGTAAACGAC                                                               | Used to increase the length of the homology region with <i>lacZ</i> for recombineering if needed                                                                                                              |
| <b>Strains construction : <math>P_{Ltet0-1}</math>-driven mScarlet fusions</b> |                                                                                                    |                                                                                                                                                                                                               |
| Ptetno-10-cat-for                                                              | CACATGACGCGCTAGCTCCCTATCAGTGATAGAGATTGACATCCCTATCAGTGATAGAGGCCAGGAATAGCCAGGAATAAAAATGAGACGTTG      | Amplification of the [TT1- $P_{Ltet0-1}$ (no - 10)- <i>cat-sacB</i> -TT2] cassette for construction of the MG2346 strain<br>Amplification of <i>nptII</i> -FRT cassette for construction of the MG2348 strain |
| Ter-catsacRev                                                                  | GATGTAAGGTTGAAAAATAAAAACGGCGCTAAAAAGCGCCGTTTTTTTGGACGGTGGTAATCAAAGGGAAAACTGTCCATATG                |                                                                                                                                                                                                               |
| Ter-Ptet-for                                                                   | GGTACCAAATTCAGAAAAAGAGGCGCTCCCGAAAGGGGGCCTTTTTTTCGTTTTGGTCCAAGTCCGATGCGACACACATGACGCGCTAGCTCCCTATC |                                                                                                                                                                                                               |
| yhbX-Ter-rev                                                                   | ATAAGCAAGGTAACCCACCCCTGAAGGGCAGGGTTGATGTAAGGTGAAAAATAAAAACGGCGCTAAAA                               |                                                                                                                                                                                                               |
| argG-Ter-for                                                                   | GCCGACAGTGGAGAATCTGGAAAAACAAAGGCCAGTAATTCGCCTCGTACCAAATTCAGAAAAAGAGGCGCTCCGAAAG                    |                                                                                                                                                                                                               |
| sacB-KanR-For                                                                  | CCTTGAACAAGGACAATTAACAGTTAACAATAAAAAACGCGAGGATCGTTTTCGCATGATTGAACAAG                               | Amplification of <i>nptII</i> -FRT cassette for construction of the MG2348 strain                                                                                                                             |
| FRT-sacB-Rev                                                                   | CAAAGGGAAAACTGTCCATATGCACAGATGAAAACGGTGTAGTATGAAATATCCTCCTTAGTTCCTATTCC                            |                                                                                                                                                                                                               |
| Ptetno-10-mSc-For                                                              | GAGATTGACATCCCTATCAGTGATAGAGGCCAGGAATACATTCGGGCGTGAGCAAAGGCGAAG                                    | Amplification of 'mScarlet-FRT' cassette (with primer Ptet-55-12For) for construction of the MG2352 strain                                                                                                    |
| mSc-FRT-Rev                                                                    | GCGAAACGATCCTCATCCTGTGCGAAGTTCCTATTCTAGAAAAGTATAGGAACTTCATTATTATACAGTTCTGCCATGCC                   |                                                                                                                                                                                                               |
| postFRT-KanR-Rev                                                               | GAACCTGCGTGCAATCCATCTTGTTCATCATGCGAAACGATCCTCATCCTGTC                                              |                                                                                                                                                                                                               |
| AK411                                                                          | ATCAGTGATAGAGATTGACATCCCTATCAGTGATAGAGGCATTGGAAGACACACGG                                           |                                                                                                                                                                                                               |
| AK412                                                                          | ATTCTTTTATTACTGCTTCGCTTTGCTCACGCCGAATGAGACGTTGATCGGCAC                                             | <i>cat-sacB</i> amplification for construction of OK509 strain                                                                                                                                                |
| AK420                                                                          | AAGCATAAAATCTTTTATTACTGCTTCGCCTTTGCTCAC                                                            |                                                                                                                                                                                                               |
| AK451                                                                          | CTGCTTCGCCTTTGCTCACCGGAAGACGGCGCAGCACATC                                                           | $P_{Ltet0-1}$ - <i>btuB</i> -240+210- <i>mScarlet</i> <sub>+4</sub> construction (with primers 5'PtetBtuB-240 and Ptet-55-12For)                                                                              |
| 5'PtetompR-35+30-lacZ                                                          | TAGAGATTGACATCCCTATCAGTGATAGAGATACTGAGCACTTACA AATTGTTGCGAACCTTTGGGAGT                             | $P_{Ltet0-1}$ <i>ompR</i> -35+717- <i>mScarlet</i> <sub>+4</sub> construction                                                                                                                                 |
| ompR+717-mScrev                                                                | GAAACGCATAAATTCTTTTATTACTGCTTCGCCTTTGCTCACTGTTTAGAGCCGTCGGTACAAAAG                                 |                                                                                                                                                                                                               |
| Ptet-sdhC-222for                                                               | GACATCCCTATCAGTGATAGAGATACTGAGCACAGGTCCTCCGGAAC ACCCTGCAATC                                        | $P_{Ltet0-1}$ <i>sdhC</i> -222+39- <i>mScarlet</i> <sub>+4</sub> construction                                                                                                                                 |
| sdhC+39-mScrev                                                                 | GAAACGCATAAATTCTTTTATTACTGCTTCGCCTTTGCTCACAGAT TAACAGGCTTTGTTTTTTCAC                               |                                                                                                                                                                                                               |
| <b>Strains construction : <i>omrA/B</i> deletions</b>                          |                                                                                                    |                                                                                                                                                                                                               |
| OmrA-kan3                                                                      | CGCGAGCGACAGTAAATTAGGTGCGAAAAAAACCTGCGCATCCGCGCAGGTTAGAAAAACTCATCGAGCA                             | a.k.a. $\Delta$ omrABrev in (10); <i>OmraA::nptI</i> construction                                                                                                                                             |
| OmrA-kan5                                                                      | CCCTTCATTCTTTGCGTTTTCTCGCTGGCGAAGAGTCGTCTGCAGACAAAGCCACGTTGTGTCTCAA                                | <i>OmraA::nptI</i> construction                                                                                                                                                                               |
| OmrB-kan3                                                                      | CGCGAGCGACAGTAAATTAGGTGCGAAAAAAACCTGCGCATCCGCGCAGGTTAGAAAAACTCATCGAGCA                             | <i>OmrbB::nptI</i> construction                                                                                                                                                                               |
| OmrB-kan5                                                                      | GCGAAACGCTGTTGCGATTGACCGCTGGTGGCGTTTTGGCTTCAGGTTGCAAAGCCACGTTGTGTCTCAA                             | a.k.a. $\Delta$ omrABfor in (10); <i>OmrbB::nptI</i> construction                                                                                                                                             |
| <b>Verification/sequencing</b>                                                 |                                                                                                    |                                                                                                                                                                                                               |
| AK87                                                                           | CCTTCTCCTGCTCTCCCTTAAGCG                                                                           | <i>argG</i> check                                                                                                                                                                                             |
| AK88                                                                           | CTCACGGGTTGTGGATGCAAAC                                                                             | <i>argG</i> check                                                                                                                                                                                             |
| AK387                                                                          | CTTCACCTCACCTCGATTTC                                                                               | <i>mScarlet</i> fusions check                                                                                                                                                                                 |

|                                                                                                                  |                                                    |                                                                              |
|------------------------------------------------------------------------------------------------------------------|----------------------------------------------------|------------------------------------------------------------------------------|
| AK418                                                                                                            | ACTGGCCTGCTTTCCTCCTC                               | <i>mScarlet</i> fusions check                                                |
| AK430                                                                                                            | CGTTCAGGAACGGATCTGC                                | <i>hfqQ8A</i> verification                                                   |
| AK431                                                                                                            | TGGAACACGTTCCCGAGC                                 | <i>hfqR16A</i> verification                                                  |
| AK432                                                                                                            | GCTTAATACCATTACCAAATC                              | <i>hfqY25D</i> verification                                                  |
| antiHfqout                                                                                                       | GATGTGTACCAGTACCGCCT                               | <i>hfq</i> check (E. Hajnsdorf)                                              |
| lacZ96-120(-)                                                                                                    | GCTATTACGCCAGCTGGCGAAAGGG                          | <i>lac</i> fusions check                                                     |
| mHfqout                                                                                                          | CAGGCGGTGACGAAGTATT                                | <i>hfq</i> check (E. Hajnsdorf)                                              |
| mhpR848-872                                                                                                      | ATCTTCCGGCGCTACAACGGGTAGC                          | <i>lac</i> fusions check                                                     |
| seqOmrArev                                                                                                       | GCATTCCAACTCCCTTTGCTC                              | <i>omrAB</i> check                                                           |
| seqOmrBfor                                                                                                       | GGTGGCGTGTTTTCATCGTGG                              | <i>omrAB</i> check                                                           |
| <b>Plasmids construction</b>                                                                                     |                                                    |                                                                              |
| OmrAmut8for                                                                                                      | GATTGGTGAGATTATTCGGGCTGGTACCCTGTCTCTGCACC          | Constructing pOmrAopt                                                        |
| OmrAmut8rev                                                                                                      | GGTGCAAGAGACAGGGTACCAGCCGAATAATCTCACCAATC          |                                                                              |
| OmrAmut9for                                                                                                      | GGTATTGATTGGTGAGATTGCGAAATACCGTCTTCGTACCCTGTCTCTTG | Constructing pOmrAM9*                                                        |
| OmrAmut9rev                                                                                                      | CAAGAGACAGGGTACGAAGACGGTATTTGCAATCTCACCAATCAATACC  |                                                                              |
| OmrAmut8+9for                                                                                                    | GATTGGTGAGATTGCGAAACGTGGTACCCTGTCTCTGCACC          | Constructing pOmrAoptM9*                                                     |
| OmrAmut8+9rev                                                                                                    | GGTGCAAGAGACAGGGTACCAGCTTTGCAATCTCACCAATC          |                                                                              |
| OmrAmut11for                                                                                                     | CCCAGAGGTATTGATTGGTCTCATTATTCGGTACGCTCTTCGTACCC    | Constructing pOmrAoptM11*                                                    |
| OmrAmut11rev                                                                                                     | GAAGAGCGTACCGAATAATGAGACCAATCAATACCTCTGGGACGTC     |                                                                              |
| AK74                                                                                                             | GAGGAGAAATTACATATGGCAGCTTATTTCC                    | Constructing pCAS18n                                                         |
| AK75                                                                                                             | GGAAATAACGTGCCATATGTAATTTCTCCTC                    | Constructing pCAS18n                                                         |
| <b>Templates for T7 <i>in vitro</i> transcription and toeprint</b>                                               |                                                    |                                                                              |
| T7btuBfor                                                                                                        | GGTAATACGACTCACTATAGCGCCAACGTCGCATCTGGTTCTC        | For <i>in vitro</i> transcription of <i>btuB</i> (-240+61) region            |
| btuBrev                                                                                                          | ATATCTGACGGGTCACAACGG                              |                                                                              |
| btuBpT7 Fw                                                                                                       | AATAATATCGACTCACTATAGGGGCCGGTCTGTGAGTTAATAGG       | For <i>in vitro</i> transcription of <i>btuB</i> (-240+61) region Mutant H1  |
| btuB 301 Rev                                                                                                     | GTGCCCAAGCGGAAAAATGCC                              |                                                                              |
| btuB 272 Rev                                                                                                     | CACGCCGTCAGCAGCGAAGCGGTGGTGGTCATTGTAAGCATCCAC      |                                                                              |
| btuB253.301 Rev                                                                                                  | GTGCCCAAGCGGAAAAATGCCGTGACGGAACACGCCGTCAGCAGCGAAGC |                                                                              |
| T7OmrAfor                                                                                                        | TAATACGACTCACTATAGGGCCAGAGGTATTGATTGGTGAG          | For <i>in vitro</i> transcription of <i>omrA</i>                             |
| OmrArev                                                                                                          | AAAAAAAAACCTGCGCATCCGCGC                           |                                                                              |
| 3995JG                                                                                                           | GTGCCCAAGCGGAAAAATGCC                              | Fig. 5E                                                                      |
| <b>Templates for T7 <i>in vitro</i> transcription of radiolabeled probes for Northern blots (used in Fig. 1)</b> |                                                    |                                                                              |
| T7btuBprobe-for                                                                                                  | TAATACGACTCACTATAGCGTACGCCATCAATTAACACCAAC         | <i>in vitro</i> transcription of the antisense of <i>btuB</i> (+85+312) mRNA |
| btuBprobe-rev                                                                                                    | GTCGTTACTGCTAACCCTTTGAACAG                         |                                                                              |
| T7OmrAprobe-for                                                                                                  | TAATACGACTCACTATAGGGAAAAAAAACCTGCGCATCCGCGC        | <i>in vitro</i> transcription of the antisense of <i>OmrA</i> sRNA           |
| OmrAprobe-rev                                                                                                    | CCCAGAGGTATTGATTGGTGAG                             |                                                                              |
| T7OmrBprobe-for                                                                                                  | TAATACGACTCACTATAGGGAAAAAAAACCTGCGCATCTGCGC        | <i>in vitro</i> transcription of the antisense of <i>OmrB</i> sRNA           |
| OmrBprobe-rev                                                                                                    | CCCAGAGGTATTGATAGGTGAAGTC                          |                                                                              |
| EM192                                                                                                            | TAATACGACTCACTATAGGGAGATGCCTGGCAGTTCCTACTC         | <i>in vitro</i> transcription of the antisense of 5S rRNA                    |
| EM193                                                                                                            | TGCCTGGCGGCAGTAGCG                                 |                                                                              |
| EM293                                                                                                            | TAATACGACTCACTATAGGGAGACGCTTTACGCCAGTAATTC         | <i>in vitro</i> transcription of the antisense of a 16S rRNA region          |
| EM294                                                                                                            | CTCCTACGGGAGGCAGCAGT                               |                                                                              |
| <b>Biotinylated probes for Northern blots</b>                                                                    |                                                    |                                                                              |
| 3'OmrA-probe                                                                                                     | BioTEG-CTGCGCATCCGCGCAGGTTGGTGCAAGAGACAGGGTAC      | Fig. 4D, S6D                                                                 |
| OmrA-probe                                                                                                       | BioTEG-CAGGTTGGTGCAAGAGACAGGGTACGAAGAGCGTACCG      | Fig. 4F, 5E, S5C and S14                                                     |
| OmrB-probe                                                                                                       | BioTEG-CGCAGGCTGGTGTAATTCATGTGCTCAACCCGAAGTTGA     | Fig. 4F, 5E and S14                                                          |
| Spot42-probe                                                                                                     | BioTEG-GTAAAAGGTCTGAAAGATAGAACATCTTACCTCTGTACCC    | Fig. 5F                                                                      |
| SsrA-probe                                                                                                       | BioTEG-CGCCACTAACAACTAGCCTGATTAAGTTTAAACGCTTCA     | Fig. 4F, 5F, S6D                                                             |
| 5S-probe                                                                                                         | BioTEG-CTACCATCGGCGCTACGGCGTTTCACTTCTGAGTTCCG      | Fig. 5E, S5C                                                                 |
